# Supplementary material
Source: HighWire-hosted journal article supplement (https://gut.bmj.com/content/66/9/1573)
Supplement: inline-supplementary-material-2 [file inline-supplementary-material-2.pdf]

| ID number | Gender: | Diagnosis | MS Date    | Age  | Allocation | MS CoN | MS CoA | Total PCDAI Score: | Total PUCAI Score: | PCDAI/PUCAI Category: | Paris Classification: | Complaint              | Fial Diagnosis                              |
|-----------|---------|-----------|------------|------|------------|--------|--------|--------------------|--------------------|-----------------------|-----------------------|------------------------|---------------------------------------------|
| 1         | Female  | CD        | 2013-11-12 | 11.4 | Validation | +      | +      | 47.5               |                    | Severe (40-100)       | A1bL2B1G1             |                        |                                             |
| 2         | Male    | Control   | 2015-04-20 | 13.5 | Validation | +      |        |                    |                    |                       |                       | Abdominal Pain         | Dietary Fructose intolerance                |
| 3         | Female  | Control   | 2013-11-19 | 15.9 | Validation | +      |        |                    |                    |                       |                       | Chronic Diarrhea       | Celiac disease, Dietary Lactose intolerance |
| 4         | Male    | CD        | 2013-11-12 | 10.2 | Validation |        | +      | 57.5               |                    | Severe (40-100)       | A1bL3B1G1             |                        |                                             |
| 5         | Male    | UC        | 2013-09-09 | 17.1 | Validation |        | +      |                    | 40                 | Moderate (36-64)      | E4 S0                 |                        |                                             |
| 6         | Male    | Control   | 2015-04-20 | 10.8 | Discovery  | +      |        |                    |                    |                       |                       | Chronic Dairrhea       | Dietary Lactose Intolerance                 |
| 7         | Female  | CD        | 2013-11-12 | 9.6  | Discovery  | +      | +      | 50                 |                    | Severe (40-100)       | A1aL2B1G1             |                        |                                             |
| 8         | Male    | Control   | 2014-11-17 | 14.8 | Validation | +      |        |                    |                    |                       |                       | Isolated Perianal Absc | Isolated perianal abscess                   |
| 9         | Male    | CD        | 2013-11-12 | 13.9 | Discovery  | +      | +      | 62.5               |                    | Severe (40-100)       | A1bL3B1PG0            |                        |                                             |
| 10        | Male    | CD        | 2014-03-18 | 10.2 | Validation | +      | +      | 57.5               |                    | Severe (40-100)       | A1bL2L4abB1G0         |                        |                                             |
| 11        | Male    | CD        | 2013-11-19 | 14.1 | Validation | +      | +      | 52.5               |                    | Severe (40-100)       | A1bL3L4aB1pG0         |                        |                                             |
| 12        | Male    | Control   | 2013-11-19 | 14.3 | Discovery  | +      |        |                    |                    |                       |                       | Rectal Bleeding        | Constipation (Rectal Bleeding)              |
| 13        | Female  | UC        | 2013-09-09 | 13.6 | Validation |        | +      |                    | 85                 | Severe (65-85)        | E4 S1                 |                        |                                             |
| 14        | Male    | Control   | 2013-09-09 | 8.6  | Validation | +      |        |                    |                    |                       |                       | Rectal Bleeding        | Solitary Rectal Ulcer                       |
| 15        | Female  | UC        | 2014-01-21 | 13.7 | Validation |        | +      |                    | 80                 | Severe (65-85)        | E4S1                  |                        |                                             |
| 16        | Male    | UC        | 2013-09-09 | 14.8 | Discovery  |        | +      |                    | 45                 | Moderate (36-64)      | E4S0                  |                        |                                             |
| 17        | Male    | CD        | 2013-11-19 | 8.1  | Validation |        | +      | 47.5               |                    | Severe (40-100)       | A1aL3L4aB1G0          |                        |                                             |
| 18        | Male    | CD        | 2013-09-09 | 9.9  | Discovery  | +      | +      | 37.5               |                    | Moderate (30-37.5)    | A1aL3B1G0             |                        |                                             |
| 19        | Male    | Control   | 2015-04-20 | 13.1 | Validation | +      |        |                    |                    |                       |                       | Rectal Bleeding        | Solitary Rectal Ulcer                       |
| 20        | Male    | Control   | 2013-07-04 | 15.3 | Validation | +      |        |                    |                    |                       |                       | Bloody Diarrhea        | Acute Self-limited Colitis (Resolved)       |
| 21        | Female  | Control   | 2015-04-20 | 16.3 | Validation | +      |        |                    |                    |                       |                       | Adominal Pain          | Esophagitis, Gastritis                      |
| 22        | Male    | Control   | 2014-01-21 | 14.2 | Discovery  | +      |        |                    |                    |                       |                       | Anemia                 | Anemia (NYD)                                |
| 23        | Male    | UC        | 2014-06-25 | 17.1 | Discovery  |        | +      |                    | 70                 | Severe (65-85)        | E4 S1                 |                        |                                             |
| 24        | Female  | CD        | 2014-11-17 | 17.0 | Validation |        | +      | 32.5               |                    | Moderate (30-37.5)    | A1bL3L4abB1G0         |                        |                                             |
| 25        | Male    | CD        | 2013-07-04 | 15.6 | Validation | +      | +      | 45                 |                    | Moderate (30-37.5)    | A1bL3B1G0             |                        |                                             |
| 26        | Female  | Control   | 2013-07-04 | 15.0 | Validation | +      |        |                    |                    |                       |                       | Abdominal Pain         | Abdominal Pain (NYD)                        |
| 27        | Male    | Control   | 2013-11-19 | 16.3 | Discovery  | +      |        |                    |                    |                       |                       | Abdominal Pain         | Constipation                                |
| 28        | Female  | Control   | 2013-11-19 | 17.0 | Validation | +      |        |                    |                    |                       |                       | Constipation           | Constipation                                |
| 29        | Male    | UC        | 2013-09-09 | 11.3 | Validation |        | +      |                    | 40                 | Moderate (36-64)      | E4 S0                 |                        |                                             |
| 30        | Female  | CD        | 2013-07-04 | 14.1 | Discovery  | +      | +      | 60                 |                    | Severe (40-100)       | A1bL3L4aB1G0          |                        |                                             |
| 31        | Female  | Control   | 2014-01-21 | 17.6 | Discovery  | +      |        |                    |                    |                       |                       | Adbdominal pain        | Dietary Lactose Intolerance                 |
| 32        | Female  | UC        | 2013-09-09 | 15.1 | Validation |        | +      |                    | 45                 | Moderate (36-64)      | E4 S0                 |                        |                                             |
| 33        | Female  | Control   | 2013-07-04 | 16.2 | Discovery  | +      |        |                    |                    |                       |                       | Rectal Bleeding        | Rectal Bleeding NYD                         |
| 34        | Male    | Control   | 2014-11-17 | 10.2 | Discovery  | +      |        |                    |                    |                       |                       | Abdominal Pain         | Abdominal pain (NYD)                        |
| 35        | Female  | CD        | 2014-11-17 | 15.2 | Discovery  |        | +      | 32.5               |                    | Moderate (30-37.5)    | A1bL1B1pG0            |                        |                                             |
| 36        | Female  | UC        | 2014-03-18 | 14.6 | Discovery  |        | +      |                    | 30                 | Mild (10-34)          | E4S0                  |                        |                                             |
| 37        | Male    | Control   | 2013-11-19 | 16.9 | Validation | +      |        |                    |                    |                       |                       | Chronic Diarrhea       | Chronic Diarrhea (NYD)                      |
| 38        | Male    | Control   | 2013-07-04 | 16.1 | Discovery  | +      |        |                    |                    |                       |                       | Chronic Diarrhea       | Chronic Diarrhea (NYD)                      |
| 39        | Male    | CD        | 2013-11-19 | 14.1 | Validation | +      | +      | 27.5               |                    | Mild (10-27.5)        | A1bL3L4aB1G0          |                        |                                             |
| 40        | Female  | Control   | 2014-01-21 | 16.5 | Validation | +      |        |                    |                    |                       |                       | Abdominal Pain         | Functional Abdominal Pain                   |
| 41        | Female  | CD        | 2014-07-02 | 16.0 | Validation | +      | +      | 55                 |                    | Severe (40-100)       | A1bL3B1G0             |                        |                                             |
| 42        | Female  | UC        | 2014-07-02 | 14.7 | Discovery  |        | +      |                    | 30                 | Mild (10-34)          | E2 S0                 |                        |                                             |
| 43        | Male    | UC        | 2014-07-02 | 13.3 | Discovery  |        | +      |                    | 30                 | Mild (10-34)          | E4S0                  |                        |                                             |
| 44        | Female  | Control   | 2015-04-20 | 11.8 | Validation | +      |        |                    |                    |                       |                       | Abdominal Pain         | Functional Abdominal Pain                   |
| 45        | Female  | UC        | 2014-01-21 | 6.8  | Discovery  |        | +      |                    | 70                 | Severe (65-85)        | E3 S1                 |                        |                                             |
| 46        | Male    | Control   | 2014-11-17 | 16.2 | Validation | +      |        |                    |                    |                       |                       | Vomiting               | Gastroesophageal Reflux Disease             |
| 47        | Female  | Control   | 2015-04-20 | 16.3 | Discovery  | +      |        |                    |                    |                       |                       | Abdominal Pain         | Dietary Lactose Intolerance                 |
| 48        | Female  | CD        | 2014-07-02 | 14.5 | Validation | +      | +      | 47.5               |                    | Severe (40-100)       | A1bL3L4aB1G0          |                        |                                             |
| 49        | Male    | UC        | 2014-01-21 | 16.3 | Discovery  |        | +      |                    | 70                 | Severe (65-85)        | E4S1                  |                        |                                             |
| 50        | Male    | CD        | 2014-07-02 | 16.5 | Discovery  | +      | +      | 57.5               |                    | Severe (40-100)       | A1bL3B1G0             |                        |                                             |
| 51        | Male    | CD        | 2014-07-02 | 17.8 | Validation | +      | +      | 57.5               |                    | Severe (40-100)       | A1bL3L4aB1G0          |                        |                                             |
| 52        | Female  | UC        | 2014-01-21 | 13.3 | Discovery  |        | +      |                    | 40                 | Moderate (36-64)      | E4S0                  |                        |                                             |
| 53        | Male    | UC        | 2014-11-17 | 17.2 | Discovery  |        | +      |                    | 60                 | Moderate (36-64)      | E4 S0                 |                        |                                             |
| 54        | Female  | UC        | 2015-04-20 | 13.9 | Validation |        | +      |                    | 70                 | Severe (65-85)        | E4S1                  |                        |                                             |
| 55        | Female  | Control   | 2014-07-02 | 17.5 | Discovery  | +      |        |                    |                    |                       |                       | Abdominal Pain         | Functional Abdominal Pain                   |

|     |        |         |            |      |              |   |   |      |  |    |                    |                 |                    |                                       |
|-----|--------|---------|------------|------|--------------|---|---|------|--|----|--------------------|-----------------|--------------------|---------------------------------------|
| 56  | Female | UC      | 2014-03-18 | 17.2 | Validation   |   | + |      |  | 75 | Severe (65-85)     | E4S1            |                    |                                       |
| 57  | Male   | Control | 2014-03-18 | 7.6  | Discovery    | + |   |      |  |    |                    |                 | Abdominal Pain     | Hydronephrosis                        |
| 58  | Male   | Control | 2014-06-25 | 14.8 | Discovery    | + |   |      |  |    |                    |                 | Rectal Bleeding    | Constipation                          |
| 59  | Female | CD      | 2014-07-02 | 10.8 | Discovery    | + | + | 27.5 |  |    | Mild (10-27.5)     | A1bL1B1pG0      |                    |                                       |
| 60  | Male   | Control | 2014-07-02 | 17.5 | Discovery    | + |   |      |  |    |                    |                 | Rectal Bleeding    | Rectal Bleeding NYD                   |
| 61  | Female | UC      | 2014-07-02 | 13.2 | Discovery    |   | + |      |  | 65 | Severe (65-85)     | E4S1            |                    |                                       |
| 62  | Male   | Control | 2014-03-18 | 11.4 | Validation   | + |   |      |  |    |                    |                 | Rectal Bleeding    | Constipation                          |
| 63  | Female | UC      | 2014-03-18 | 16.5 | Validation   |   | + |      |  | 45 | Moderate (36-64)   | E4S0            |                    |                                       |
| 64  | Male   | CD      | 2015-04-20 | 12.9 | Discovery    |   | + | 62.5 |  |    | Severe (40-100)    | AlbL3L4aB1pG0   |                    |                                       |
| 65  | Male   | CD      | 2015-04-20 | 16.8 | Discovery    | + | + | 32.5 |  |    | Moderate (30-37.5) | A1bL3B1G0       |                    |                                       |
| 66  | Female | Control | 2014-06-25 | 10.1 | Validation   | + |   |      |  |    |                    |                 | Abdominal Pain     | Gastroesophageal Reflux Disease       |
| 67  | Female | UC      | 2014-06-25 | 12.2 | Discovery    |   | + |      |  | 70 | Severe (65-85)     | E4 S1           |                    |                                       |
| 68  | Female | UC      | 2014-03-18 | 7.4  | Validation   |   | + |      |  | 60 | Moderate (36-64)   | E4S0            |                    |                                       |
| 69  | Female | Control | 2014-03-18 | 16.8 | Discovery    | + |   |      |  |    |                    |                 | Rectal Bleeding    | Constipation                          |
| 70  | Male   | UC      | 2014-03-18 | 15.6 | Discovery    |   | + |      |  | 55 | Moderate (36-64)   | E4 S0           |                    |                                       |
| 71  | Female | CD      | 2014-03-18 | 4.8  | Discovery    | + | + | 37.5 |  |    | Moderate (30-37.5) | A1aL2L4aB1G0    |                    |                                       |
| 72  | Male   | CD      | 2014-03-18 | 15.1 | Validation   |   | + | 32.5 |  |    | Moderate (30-37.5) | Alb L3L4a B1pG0 |                    |                                       |
| 73  | Male   | UC      | 2014-03-18 | 15.3 | Discovery    |   | + |      |  | 10 | Mild (10-34)       | E4 S0           |                    |                                       |
| 74  | Female | Control | 2014-07-02 | 12.8 | Validation   | + |   |      |  |    |                    |                 | Rectal Bleeding    | Juvenile polyp                        |
| 75  | Female | Control | 2014-06-25 | 11.4 | Discovery    | + |   |      |  |    |                    |                 | Abdominal Pain     | Gastritis                             |
| 76  | Female | Control | 2014-06-25 | 12.3 | Discovery    | + |   |      |  |    |                    |                 | Chronic Diarrhea   | Normal                                |
| 77  | Male   | CD      | 2014-06-25 | 10.8 | Validation   | + | + | 12.5 |  |    | Mild (10-27.5)     | A1aL3L4aB1G0    |                    |                                       |
| 78  | Male   | UC      | 2014-06-25 | 10.6 | Validation   |   | + |      |  | 15 | Mild (10-34)       | E4 S0           |                    |                                       |
| 79  | Male   | CD      | 2014-07-02 | 12.8 | Discovery    | + | + | 47.5 |  |    | Severe (40-100)    | A1bL3B1pG0      |                    |                                       |
| 80  | Male   | Control | 2014-06-25 | 15.2 | Discovery    | + |   |      |  |    |                    |                 | Chronic Diarrhea   | Constipation                          |
| 81  | Female | UC      | 2014-11-17 | 11.1 | Validation   |   | + |      |  | 40 | Moderate (36-64)   | E4 S0           |                    |                                       |
| 82  | Female | Control | 2015-04-20 | 16.7 | Discovery    | + |   |      |  |    |                    |                 | Abdominal Pain     | Dietary Lactose Intolerance           |
| 83  | Male   | UC      | 2015-04-20 | 12.8 | Validation   |   | + |      |  | 50 | Moderate (36-64)   | E3 S0           |                    |                                       |
| 84  | Female | CD      | 2015-04-20 | 15.0 | Validation   |   | + | 67.5 |  |    | Severe (40-100)    | A1bL3B1G0       |                    |                                       |
| 85  | Male   | UC      | 2014-11-17 | 6.8  | Validation   |   | + |      |  | 50 | Moderate (36-64)   | E4 S0           |                    |                                       |
| 86  | Female | Control | 2014-11-17 | 6.1  | Discovery    | + |   |      |  |    |                    |                 | Fatigue            | Eosiniphilic Esophagitis              |
| 87  | Male   | CD      | 2014-11-17 | 16.6 | Discovery    | + | + | 17.5 |  |    | Mild (10-27.5)     | A1bL3B1G1       |                    |                                       |
| 88  | Female | Control | 2015-04-20 | 15.8 | Discovery    | + |   |      |  |    |                    |                 | Perianal Skin Tags | Constipation                          |
| 89  | Male   | CD      | 2015-04-20 | 17.0 | Discovery    | + | + | 45   |  |    | Severe (40-100)    | A1bL1L4bB1G0    |                    |                                       |
| 90  | Male   | CD      | 2014-11-17 | 17.2 | Discovery    | + | + | 22.5 |  |    | Mild (10-27.5)     | A1bL3B1G0       |                    |                                       |
| 91  | Female | UC      | 2014-11-17 | 15.7 | Discovery    |   | + |      |  | 45 | Moderate (36-64)   | E4 S0           |                    |                                       |
| 92  | Male   | CD      | 2014-11-17 | 11.4 | Discovery    | + | + | 35   |  |    | Moderate (30-37.5) | A1bL4aL3B1G1    |                    |                                       |
| 93  | Male   | Control | 2015-04-20 | 16.6 | Validation   | + |   |      |  |    |                    |                 | Bloody Diarrhea    | Constipation                          |
| 94  | Female | UC      | 2014-11-17 | 17.0 | Validation   |   | + |      |  | 40 | Moderate (36-64)   | E4 S0           |                    |                                       |
| 95  | Male   | UC      | 2015-04-20 | 14.9 | Validation   |   | + |      |  | 65 | Moderate (36-64)   | E2,S1           |                    |                                       |
| 96  | Male   | CD      | 2015-04-20 | 13.2 | Validation   | + | + | 35   |  |    | Moderate (30-37.5) | A1bL3B1G0       |                    |                                       |
| 97  | Female | UC      | 2015-04-20 | 17.5 | Discovery    |   | + |      |  | 20 | Mild (10-34)       | E4S0            |                    |                                       |
| 98  | Female | Control | 2015-04-20 | 17.5 | Validation   | + |   |      |  |    |                    |                 | Abdomnal Pain      | Irritable Bowel Syndrome              |
| 99  | Female | Control | 2015-04-20 | 15.7 | Validation   | + |   |      |  |    |                    |                 | Rectal Bleeding    | Acute Self-limited Colitis (Resolved) |
| 100 | Male   | CD      | 2013-07-04 | 12.3 | EXCLUDED Out | + | + | 67.5 |  |    | Severe (40-100)    | A1bL3B1pG0      |                    |                                       |
