# Supplementary material
Source: HighWire-hosted journal article supplement (https://gut.bmj.com/content/66/9/1573)
Supplement: inline-supplementary-material-6 [file inline-supplementary-material-6.pdf]

| Biological Processes  | Subprocess                                                   | Sub-subprocess                                     | Sub-Sub-subprocess                                 | # genes | Percent of gene hit against total # genes | Percent of gene hit against total # Pathway hits |
|-----------------------|--------------------------------------------------------------|----------------------------------------------------|----------------------------------------------------|---------|-------------------------------------------|--------------------------------------------------|
| metabolic process     |                                                              |                                                    |                                                    | 114     | 49.40%                                    | 24.90%                                           |
|                       | biosynthetic process (GO:0009058)                            |                                                    |                                                    | 8       | 7.00%                                     | 4.80%                                            |
|                       | nitrogen compound metabolic process (GO:0006807)             |                                                    |                                                    | 15      | 13.20%                                    | 9.10%                                            |
|                       | phosphate-containing compound metabolic process (GO:0006796) |                                                    |                                                    | 24      | 21.10%                                    | 14.50%                                           |
|                       | generation of precursor metabolites and energy (GO:0006091)  |                                                    |                                                    | 2       | 1.80%                                     | 1.20%                                            |
|                       | catabolic process (GO:0009056)                               |                                                    |                                                    | 12      | 10.50%                                    | 7.30%                                            |
|                       | sulfur compound metabolic process (GO:0006790)               |                                                    |                                                    | 1       | 0.90%                                     | 0.60%                                            |
|                       | primary metabolic process (GO:0044238)                       |                                                    |                                                    | 103     | 90.40%                                    | 62.40%                                           |
|                       |                                                              | nucleobase-containing compound metabolic process   |                                                    | 26      | 25.20%                                    | 23.90%                                           |
|                       |                                                              | lipid metabolic process (GO:0006629)               |                                                    | 8       | 7.80%                                     | 7.30%                                            |
|                       |                                                              | cellular amino acid metabolic process (GO:0006520) |                                                    | 1       | 1.00%                                     | 0.90%                                            |
|                       |                                                              | carbohydrate metabolic process (GO:0005975)        |                                                    | 3       | 2.90%                                     | 2.80%                                            |
|                       |                                                              | protein metabolic process (GO:0019538)             |                                                    | 71      | 68.90%                                    | 65.10%                                           |
|                       |                                                              |                                                    | proteolysis (GO:0006508)                           | 36      | 50.70%                                    | 52.20%                                           |
|                       |                                                              |                                                    | translation (GO:0006412)                           | 1       | 1.40%                                     | 1.40%                                            |
|                       |                                                              |                                                    | protein complex assembly (GO:0006461)              | 1       | 1.40%                                     | 1.40%                                            |
|                       |                                                              |                                                    | protein folding (GO:0006457)                       | 7       | 9.90%                                     | 10.10%                                           |
|                       |                                                              |                                                    | cellular protein modification process (GO:0006464) | 24      | 33.80%                                    | 34.80%                                           |
| cellular process      |                                                              |                                                    |                                                    | 95      | 41.10%                                    | 20.70%                                           |
|                       | cellular component movement (GO:0006928)                     |                                                    |                                                    | 8       | 8.40%                                     | 10.30%                                           |
|                       | cytokinesis (GO:0000910)                                     |                                                    |                                                    | 2       | 2.10%                                     | 2.60%                                            |
|                       | cell cycle (GO:0007049)                                      |                                                    |                                                    | 21      | 22.10%                                    | 26.90%                                           |
|                       | chromosome segregation (GO:0007059)                          |                                                    |                                                    | 1       | 1.10%                                     | 1.30%                                            |
|                       | cell proliferation (GO:0008283)                              |                                                    |                                                    | 3       | 3.20%                                     | 3.80%                                            |
|                       | cell communication (GO:0007154)                              |                                                    |                                                    | 43      | 45.30%                                    | 55.10%                                           |
| response to stimulus  |                                                              |                                                    |                                                    | 61      | 26.40%                                    | 13.30%                                           |
|                       | response to biotic stimulus (GO:0009607)                     |                                                    |                                                    | 2       | 3.30%                                     | 3.60%                                            |
|                       | response to external stimulus (GO:0009605)                   |                                                    |                                                    | 12      | 19.70%                                    | 21.40%                                           |
|                       | response to stress (GO:0006950)                              |                                                    |                                                    | 22      | 36.10%                                    | 39.30%                                           |
|                       | behavior (GO:0007610)                                        |                                                    |                                                    | 1       | 1.60%                                     | 1.80%                                            |
|                       | cellular defense response (GO:0006968)                       |                                                    |                                                    | 8       | 13.10%                                    | 14.30%                                           |
|                       | immune response (GO:0006955)                                 |                                                    |                                                    | 10      | 16.40%                                    | 17.90%                                           |
|                       | defense response to bacterium (GO:0042742)                   |                                                    |                                                    | 1       | 1.60%                                     | 1.80%                                            |
| immune system process |                                                              |                                                    |                                                    | 44      | 19.00%                                    | 9.60%                                            |
|                       | macrophage activation (GO:0042116)                           |                                                    |                                                    | 6       | 13.60%                                    | 25.00%                                           |
|                       | antigen processing and presentation (GO:0019882)             |                                                    |                                                    | 8       | 18.20%                                    | 33.30%                                           |
|                       | immune response (GO:0006955)                                 |                                                    |                                                    | 10      | 22.70%                                    | 41.70%                                           |
| localization          |                                                              |                                                    |                                                    | 37      | 16.00%                                    | 8.10%                                            |
| biological regulation |                                                              |                                                    |                                                    | 34      | 14.70%                                    | 7.40%                                            |
| developmental process |                                                              |                                                    |                                                    | 19      | 8.20%                                     | 4.10%                                            |

|                                               |  |  |  |    |       |       |
|-----------------------------------------------|--|--|--|----|-------|-------|
| cellular component organization or biogenesis |  |  |  | 17 | 7.40% | 3.70% |
| biological adhesion                           |  |  |  | 14 | 6.10% | 3.10% |
| multicellular organismal process              |  |  |  | 13 | 5.60% | 2.80% |
| apoptotic process                             |  |  |  | 5  | 2.20% | 1.10% |
| reproduction                                  |  |  |  | 3  | 1.30% | 0.70% |
| locomotion                                    |  |  |  | 2  | 0.90% | 0.40% |

| Molecular Function                                              | # genes | Percent of gene hit against total # genes | Percent of gene hit against total # Pathway hits |
|-----------------------------------------------------------------|---------|-------------------------------------------|--------------------------------------------------|
| catalytic activity (GO:0003824)                                 | 86      | 37.20%                                    | 39.60%                                           |
| binding (GO:0005488)                                            | 62      | 26.80%                                    | 28.60%                                           |
| receptor activity (GO:0004872)                                  | 18      | 7.80%                                     | 8.30%                                            |
| transporter activity (GO:0005215)                               | 16      | 6.90%                                     | 7.40%                                            |
| enzyme regulator activity (GO:0030234)                          | 14      | 6.10%                                     | 6.50%                                            |
| structural molecule activity (GO:0005198)                       | 14      | 6.10%                                     | 6.50%                                            |
| nucleic acid binding transcription factor activity (GO:0001071) | 4       | 1.70%                                     | 1.80%                                            |
| translation regulator activity (GO:0045182)                     | 1       | 0.40%                                     | 0.50%                                            |
| protein binding transcription factor activity (GO:0009888)      | 1       | 0.40%                                     | 0.50%                                            |
| antioxidant activity (GO:0016209)                               | 1       | 0.40%                                     | 0.50%                                            |

| Protein Class                                               | # genes | Percent of gene hit against total # genes | Percent of gene hit against total # Pathway hits |
|-------------------------------------------------------------|---------|-------------------------------------------|--------------------------------------------------|
| hydrolase (PC00121)                                         | 33      | 14.30%                                    | 11.40%                                           |
| signaling molecule (PC00207)                                | 24      | 10.40%                                    | 8.30%                                            |
| enzyme modulator (PC00095)                                  | 23      | 10.00%                                    | 8.00%                                            |
| defense/immunity protein (PC00090)                          | 22      | 9.50%                                     | 7.60%                                            |
| transferase (PC00220)                                       | 19      | 8.20%                                     | 6.60%                                            |
| receptor (PC00197)                                          | 19      | 8.20%                                     | 6.60%                                            |
| protease (PC00190)                                          | 17      | 7.40%                                     | 5.90%                                            |
| nucleic acid binding (PC00171)                              | 15      | 6.50%                                     | 5.20%                                            |
| cell adhesion molecule (PC00069)                            | 14      | 6.10%                                     | 4.80%                                            |
| calcium-binding protein (PC00060)                           | 13      | 5.60%                                     | 4.50%                                            |
| kinase (PC00137)                                            | 13      | 5.60%                                     | 4.50%                                            |
| transporter (PC00227)                                       | 12      | 5.20%                                     | 4.20%                                            |
| cytoskeletal protein (PC00085)                              | 11      | 4.80%                                     | 3.80%                                            |
| membrane traffic protein (PC00150)                          | 8       | 3.50%                                     | 2.80%                                            |
| extracellular matrix protein (PC00102)                      | 7       | 3.00%                                     | 2.40%                                            |
| transfer/carrier protein (PC00219)                          | 7       | 3.00%                                     | 2.40%                                            |
| transcription factor (PC00218)                              | 7       | 3.00%                                     | 2.40%                                            |
| isomerase (PC00135)                                         | 5       | 2.20%                                     | 1.70%                                            |
| oxidoreductase (PC00176)                                    | 4       | 1.70%                                     | 1.40%                                            |
| chaperone (PC00072)                                         | 4       | 1.70%                                     | 1.40%                                            |
| ligase (PC00142)                                            | 2       | 0.90%                                     | 0.70%                                            |
| phosphatase (PC00181)                                       | 2       | 0.90%                                     | 0.70%                                            |
| surfactant (PC00212)                                        | 2       | 0.90%                                     | 0.70%                                            |
| storage protein (PC00210)                                   | 2       | 0.90%                                     | 0.70%                                            |
| transmembrane receptor regulatory/adaptor protein (PC00226) | 1       | 0.40%                                     | 0.30%                                            |
| lyase (PC00144)                                             | 1       | 0.40%                                     | 0.30%                                            |
| cell junction protein (PC00070)                             | 1       | 0.40%                                     | 0.30%                                            |
| structural protein (PC00211)                                | 1       | 0.40%                                     | 0.30%                                            |

| Pathway                                                                                 | # genes | Percent of gene hit against total # genes | Percent of gene hit against total # Pathway hits |
|-----------------------------------------------------------------------------------------|---------|-------------------------------------------|--------------------------------------------------|
| Integrin signalling pathway (P00034)                                                    | 16      | 6.90%                                     | 5.10%                                            |
| Inflammation mediated by chemokine and cytokine signaling pathway (P00031)              | 15      | 6.50%                                     | 4.80%                                            |
| Ubiquitin proteasome pathway (P00060)                                                   | 15      | 6.50%                                     | 4.80%                                            |
| CCKR signaling map (P06959)                                                             | 15      | 6.50%                                     | 4.80%                                            |
| Angiogenesis (P00005)                                                                   | 14      | 6.10%                                     | 4.50%                                            |
| Parkinson disease (P00049)                                                              | 13      | 5.60%                                     | 4.10%                                            |
| T cell activation (P00053)                                                              | 12      | 5.20%                                     | 3.80%                                            |
| FGF signaling pathway (P00021)                                                          | 12      | 5.20%                                     | 3.80%                                            |
| EGF receptor signaling pathway (P00018)                                                 | 11      | 4.80%                                     | 3.50%                                            |
| Gonadotropin releasing hormone receptor pathway (P06664)                                | 11      | 4.80%                                     | 3.50%                                            |
| VEGF signaling pathway (P00056)                                                         | 10      | 4.30%                                     | 3.20%                                            |
| Ras Pathway (P04393)                                                                    | 10      | 4.30%                                     | 3.20%                                            |
| PDGF signaling pathway (P00047)                                                         | 10      | 4.30%                                     | 3.20%                                            |
| B cell activation (P00010)                                                              | 10      | 4.30%                                     | 3.20%                                            |
| Cell cycle (P00013)                                                                     | 8       | 3.50%                                     | 2.50%                                            |
| Apoptosis signaling pathway (P00006)                                                    | 7       | 3.00%                                     | 2.20%                                            |
| Toll receptor signaling pathway (P00054)                                                | 7       | 3.00%                                     | 2.20%                                            |
| Cytoskeletal regulation by Rho GTPase (P00016)                                          | 7       | 3.00%                                     | 2.20%                                            |
| Axon guidance mediated by netrin (P00009)                                               | 6       | 2.60%                                     | 1.90%                                            |
| Interleukin signaling pathway (P00036)                                                  | 6       | 2.60%                                     | 1.90%                                            |
| Endothelin signaling pathway (P00019)                                                   | 6       | 2.60%                                     | 1.90%                                            |
| Alzheimer disease-amyloid secretase pathway (P00003)                                    | 5       | 2.20%                                     | 1.60%                                            |
| Insulin/IGF pathway-mitogen activated protein kinase kinase/MAP kinase cascade (P00032) | 5       | 2.20%                                     | 1.60%                                            |
| TGF-beta signaling pathway (P00052)                                                     | 5       | 2.20%                                     | 1.60%                                            |
| SHT2 type receptor mediated signaling pathway (P04374)                                  | 4       | 1.70%                                     | 1.30%                                            |
| Hypoxia response via HIF activation (P00030)                                            | 4       | 1.70%                                     | 1.30%                                            |
| p53 pathway feedback loops 2 (P04398)                                                   | 4       | 1.70%                                     | 1.30%                                            |
| Wnt signaling pathway (P00057)                                                          | 4       | 1.70%                                     | 1.30%                                            |
| Thyrotropin-releasing hormone receptor signaling pathway (P04394)                       | 4       | 1.70%                                     | 1.30%                                            |
| Oxytocin receptor mediated signaling pathway (P04391)                                   | 4       | 1.70%                                     | 1.30%                                            |
| Histamine H1 receptor mediated signaling pathway (P04385)                               | 4       | 1.70%                                     | 1.30%                                            |
| Axon guidance mediated by semaphorins (P00007)                                          | 3       | 1.30%                                     | 1.00%                                            |
| Interferon-gamma signaling pathway (P00035)                                             | 3       | 1.30%                                     | 1.00%                                            |
| p53 pathway (P00059)                                                                    | 3       | 1.30%                                     | 1.00%                                            |
| Adenine and hypoxanthine salvage pathway (P02723)                                       | 3       | 1.30%                                     | 1.00%                                            |
| PI3 kinase pathway (P00048)                                                             | 3       | 1.30%                                     | 1.00%                                            |

|                                                                                            |   |       |       |
|--------------------------------------------------------------------------------------------|---|-------|-------|
| Blood coagulation (P00011)                                                                 | 3 | 1.30% | 1.00% |
| Angiotensin II-stimulated signaling through G proteins and beta-arrestin (P05911)          | 3 | 1.30% | 1.00% |
| Axon guidance mediated by Slit/Robo (P00008)                                               | 2 | 0.90% | 0.60% |
| Alzheimer disease-presenilin pathway (P00004)                                              | 2 | 0.90% | 0.60% |
| Huntington disease (P00029)                                                                | 2 | 0.90% | 0.60% |
| Heterotrimeric G-protein signaling pathway-Gq alpha and Go alpha mediated pathway (P00027) | 2 | 0.90% | 0.60% |
| Glycolysis (P00024)                                                                        | 2 | 0.90% | 0.60% |
| Xanthine and guanine salvage pathway (P02788)                                              | 2 | 0.90% | 0.60% |
| p38 MAPK pathway (P05918)                                                                  | 2 | 0.90% | 0.60% |
| Oxidative stress response (P00046)                                                         | 2 | 0.90% | 0.60% |
| Muscarinic acetylcholine receptor 1 and 3 signaling pathway (P00042)                       | 2 | 0.90% | 0.60% |
| De novo purine biosynthesis (P02738)                                                       | 1 | 0.40% | 0.30% |
| Purine metabolism (P02769)                                                                 | 1 | 0.40% | 0.30% |
| Alpha adrenergic receptor signaling pathway (P00002)                                       | 1 | 0.40% | 0.30% |
| Insulin/IGF pathway-protein kinase B signaling cascade (P00033)                            | 1 | 0.40% | 0.30% |
| Pentose phosphate pathway (P02762)                                                         | 1 | 0.40% | 0.30% |
| p53 pathway by glucose deprivation (P04397)                                                | 1 | 0.40% | 0.30% |
| Plasminogen activating cascade (P00050)                                                    | 1 | 0.40% | 0.30% |
| Lysine biosynthesis (P02751)                                                               | 1 | 0.40% | 0.30% |
| Nicotinic acetylcholine receptor signaling pathway (P00044)                                | 1 | 0.40% | 0.30% |
| Cadherin signaling pathway (P00012)                                                        | 1 | 0.40% | 0.30% |
| Metabotropic glutamate receptor group I pathway (P00041)                                   | 1 | 0.40% | 0.30% |
