# Supplementary material
Source: HighWire-hosted journal article supplement (https://gut.bmj.com/content/66/9/1573)
Supplement: inline-supplementary-material-7 [file inline-supplementary-material-7.pdf]

| Protein names                                                                                 | Uniprot  | Gene names   | Discovery                      |                            |                   |                      |             | ttest IBD vs Control p value | FDR adjusted p value | AUC | Subgroup Specific | Immunolgical |
|-----------------------------------------------------------------------------------------------|----------|--------------|--------------------------------|----------------------------|-------------------|----------------------|-------------|------------------------------|----------------------|-----|-------------------|--------------|
|                                                                                               |          |              | Average Log2 L/H ratio Control | Average Log2 L/H ratio IBD | Ratio ibd/control | Significant 0.05 FDR |             |                              |                      |     |                   |              |
| Aconitate hydratase, mitochondrial                                                            | A2A274   | ACO2         | 2.570537714                    | 1.404944787                | 0.311737769       | +                    | 1.26481E-09 | 8.472E-08                    | 0.92417              |     |                   |              |
| CD9 antigen                                                                                   | A6NNI4   | CD9          | 2.690874857                    | 1.62514501                 | 0.344476348       | +                    | 3.02524E-10 | 2.606E-08                    | 0.95583              |     |                   |              |
| Calponin-2                                                                                    | B4DDF4   | CNN2         | 0.388970715                    | 0.995038293                | 1.833208258       | +                    | 0.000445883 | 0.0044168                    | 0.755                |     |                   |              |
| 6-phosphogluconate dehydrogenase, decarboxylating                                             | B4DQJ8   | PGD          | -0.252090674                   | 0.391282139                | 1.902888154       | +                    | 1.35886E-13 | 8.373E-11                    | 0.96625              |     |                   |              |
| Epithelial cell adhesion molecule                                                             | B5MCA4   | EPCAM        | 3.405798843                    | 2.468926837                | 0.39185163        | +                    | 0.002975231 | 0.0215657                    | 0.80625              |     |                   |              |
| 2,4-dienoyl-CoA reductase, mitochondrial                                                      | B7Z6B8   | DECR1        | 2.240008                       | 1.557225501                | 0.50520929        | +                    | 0.003411719 | 0.023728                     | 0.72042              |     |                   |              |
| Adenosylhomocysteinase;Putative adenosylhomocysteinase 3                                      | D7UEQ7   | AHCYL2       | 2.14170094                     | 1.336080036                | 0.446810414       | +                    | 0.000222911 | 0.0024884                    | 0.84583              |     |                   |              |
| CD44 antigen                                                                                  | E7EPC6   | CD44         | 1.30554758                     | 1.619074953                | 1.368242916       |                      | 0.094110279 | 0.2905348                    | 0.62625              |     |                   |              |
| Lactotransferrin;Lactoferricin-H;Kaliocin-1;Lactoferronin-A;Lactoferronin-B;Lactoferronin-C   | E7ER44   | LTF          | 1.276691743                    | 1.810737039                | 1.705818912       |                      | 0.396468431 | 0.7158                       | 0.59625              |     | +                 |              |
| Calpastatin                                                                                   | E7ESM9   | CAST         | 1.476781033                    | 1.149459479                | 0.720851913       |                      | 0.081528203 | 0.2635765                    | 0.53083              |     |                   |              |
| Mucin-2                                                                                       | E7EUV1   | MUC2         | 2.760394361                    | 2.073574027                | 0.503173452       |                      | 0.128786237 | 0.3581141                    | 0.6325               |     |                   |              |
| Acyl-CoA synthetase family member 2, mitochondrial                                            | E9PF16   | ACSF2        | 1.026815768                    | 0.304245583                | 0.485502819       |                      | 0.210674608 | 0.4921065                    | 0.54208              |     | +                 |              |
|                                                                                               |          | DCAF5;NUC B2 |                                |                            |                   |                      |             |                              |                      |     |                   |              |
| Nucleobindin-2;Nesfatin-1                                                                     | E9PKG6   |              | 0.915221743                    | 1.774483524                | 2.361416807       | +                    | 1.89419E-06 | 4.148E-05                    | 0.95208              |     | +                 |              |
| NADH dehydrogenase [ubiquinone] 1 alpha subcomplex subunit 13                                 | J3KN00   | NDUFA13      | 1.6388984                      | 0.978165566                | 0.516472707       | +                    | 8.7398E-07  | 2.104E-05                    | 0.88042              |     |                   |              |
| SWI/SNF-related matrix-associated actin-dependent regulator of chromatin subfamily A member 5 | O60264   | SMARCA5      | -0.43067683                    | -0.095800555               | 1.397767436       | +                    | 0.003616575 | 0.0249277                    | 0.68854              |     |                   |              |
| UDP-glucose 6-dehydrogenase                                                                   | O60701   | UGDH         | 2.019972095                    | 0.517026788                | 0.22247394        | +                    | 5.37193E-12 | 1.23E-09                     | 0.98083              |     |                   |              |
| Filamin-B                                                                                     | O75369-8 | FLNB         | 2.07167981                     | 1.32759716                 | 0.475169997       | +                    | 2.40541E-10 | 2.18E-08                     | 0.96125              |     |                   |              |
| N(G),N(G)-dimethylarginine dimethylaminohydrolase 1                                           | O94760   | DDAH1        | 1.985487052                    | 1.065327505                | 0.398455464       | +                    | 4.43403E-06 | 8.701E-05                    | 0.865                |     |                   |              |
| Unconventional myosin-Id                                                                      | O94832   | MYO1D        | 1.442258662                    | 0.345412038                | 0.333922408       | +                    | 0.001613906 | 0.0132598                    | 0.62958              |     |                   |              |
| Alcohol dehydrogenase 1C                                                                      | P00326   | ADH1C        | 3.444803062                    | 2.536813679                | 0.40333436        |                      | 0.023590067 | 0.1073915                    | 0.78875              |     |                   |              |
| Retinal dehydrogenase 1                                                                       | P00352   | ALDH1A1      | -0.874832667                   | -1.564042867               | 0.50197237        | +                    | 1.21126E-10 | 1.323E-08                    | 0.92042              |     |                   |              |
| Alpha-2-macroglobulin                                                                         | P01023   | A2M          | 3.036029313                    | 2.26088898                 | 0.460639134       |                      | 0.049936121 | 0.1885456                    | 0.62208              |     |                   |              |
| Ig kappa chain C region                                                                       | P01834   | IGKC         | 4.595902905                    | 4.3289014                  | 0.765671919       |                      | 0.384620978 | 0.700779                     | 0.51917              |     | +                 |              |
| Ig gamma-1 chain C region                                                                     | P01857   | IGHG1        | 4.890644881                    | 4.10732186                 | 0.456885247       |                      | 0.201767691 | 0.4774549                    | 0.53333              |     | +                 |              |
| ATP synthase protein 8                                                                        | P03928   | MT-ATP8      | 1.69536719                     | 1.230508637                | 0.628223959       | +                    | 7.408E-05   | 0.0009671                    | 0.78833              |     |                   |              |
| Superoxide dismutase [Mn], mitochondrial                                                      | P04179-4 | SOD2         | 2.467924147                    | 3.534535587                | 2.905517278       | +                    | 0.004034131 | 0.0271973                    | 0.73958              |     |                   |              |
| Integrin beta-2;Integrin beta                                                                 | P05107   | ITGB2        | 1.028402275                    | 1.835161266                | 2.240634289       |                      | 0.212580347 | 0.4939367                    | 0.7                  |     | +                 |              |
| Lithostathine-1-alpha                                                                         | P05451   | REG1A        | 3.59843686                     | 3.453934064                | 0.865452493       |                      | 0.86084085  | 0.8598939                    | 0.54958              |     |                   |              |
| HLA class I histocompatibility antigen, A-24 alpha chain                                      | P05534   | HLA-A        | 2.65743164                     | 2.314551266                | 0.709723108       |                      | 0.38283986  | 0.6987735                    | 0.50917              |     | +                 |              |
| Keratin, type I cytoskeletal 18                                                               | P05783   | KRT18        | 0.336481814                    | -0.210425015               | 0.578737178       | +                    | 7.66127E-05 | 0.0009835                    | 0.83625              |     |                   |              |
| Protein disulfide-isomerase                                                                   | P07237   | P4HB         | 0.586421814                    | 1.217275473                | 1.879214103       | +                    | 2.04193E-15 | 2.965E-12                    | 0.97167              |     |                   |              |
| Histone H1.0;Histone H1.0, N-terminally processed                                             | P07305   | H1FO         | 1.712466143                    | 1.026387165                | 0.503546621       | +                    | 6.63183E-09 | 3.296E-07                    | 0.91958              |     |                   |              |
| Cytochrome b-c1 complex subunit 6, mitochondrial                                              | P07919   | UQCRC        | 1.55412155                     | 0.998343741                | 0.573625916       | +                    | 6.47782E-05 | 0.0008566                    | 0.82667              |     |                   |              |
| Fumarate hydratase, mitochondrial                                                             | P07954-2 | FH           | 1.718428914                    | 1.275648415                | 0.642248165       | +                    | 0.004605623 | 0.0300634                    | 0.72542              |     |                   |              |
| Heat shock 70 kDa protein 1A/1B                                                               | P08107   | HSPA1A       | -0.56068419                    | -1.190164907               | 0.532868439       | +                    | 6.08803E-10 | 4.466E-08                    | 0.91375              |     |                   |              |
| Neutrophil elastase                                                                           | P08246   | ELANE        | 1.723168668                    | 4.392458158                | 14.42971308       | +                    | 0.006691886 | 0.0401904                    | 0.62312              |     |                   |              |
| Villin-1                                                                                      | P09327   | VIL1         | 2.907740571                    | 1.714527197                | 0.303245256       | +                    | 2.29018E-10 | 2.138E-08                    | 0.94667              |     |                   |              |
| Cytochrome c oxidase subunit 6C                                                               | P09669   | COX6C        | 2.320869048                    | 1.472859763                | 0.428266641       | +                    | 6.65585E-11 | 8.544E-09                    | 0.96125              |     |                   |              |
| 78 kDa glucose-regulated protein                                                              | P11021   | HSPA5        | 0.652906076                    | 1.293223987                | 1.897083886       | +                    | 1.0323E-11  | 2.12E-09                     | 0.95833              |     |                   |              |
| Glycogen phosphorylase, brain form                                                            | P11216   | PYGB         | 1.218937348                    | 0.704638813                | 0.597919868       | +                    | 0.000203123 | 0.0022924                    | 0.76667              |     |                   |              |
| Creatine kinase B-type                                                                        | P12277   | CKB          | 0.481385606                    | -1.366676189               | 0.15754222        | +                    | 8.20253E-11 | 1.011E-08                    | 0.91875              |     |                   |              |
| Annexin A3;Annexin                                                                            | P12429   | ANXA3        | -0.553572683                   | 0.817116577                | 3.93806411        | +                    | 3.39509E-09 | 2.051E-07                    | 0.94542              |     | +                 |              |
|                                                                                               |          | CKMT1A;CK    |                                |                            |                   |                      |             |                              |                      |     |                   |              |
| Creatine kinase U-type, mitochondrial                                                         | P12532   | MT1B         | 3.573094                       | 2.864332852                | 0.492253649       |                      | 0.009281958 | 0.0532546                    | 0.75333              |     |                   |              |
| Plastin-3                                                                                     | P13797   | PLS3         | -1.447676348                   | -1.94208503                | 0.609931464       |                      | 0.025792643 | 0.1155046                    | 0.64875              |     |                   |              |
| Electron transfer flavoprotein subunit alpha, mitochondrial                                   | P13804   | ETFA         | 0.867572062                    | 0.197485601                | 0.511664337       | +                    | 3.04472E-10 | 2.606E-08                    | 0.92792              |     |                   |              |
| Endoplasmic                                                                                   | P14625   | HSP90B1      | 1.204950952                    | 1.853136533                | 1.912068386       | +                    | 1.24524E-10 | 1.323E-08                    | 0.94167              |     | +                 |              |
| Junction plakoglobin                                                                          | P14923   | JUP          | 2.393550833                    | 1.588661941                | 0.447137604       | +                    | 0.000241936 | 0.0026813                    | 0.83708              |     |                   |              |
| Cytochrome b-c1 complex subunit 7                                                             | P14927   | UQCRCB       | 1.72414497                     | 0.990594253                | 0.480200902       | +                    | 0.000309798 | 0.0032484                    | 0.86938              |     |                   |              |
| Carbonyl reductase [NADPH] 1                                                                  | P16152   | CBR1         | 2.42399975                     | 1.84137733                 | 0.558432001       | +                    | 1.54838E-05 | 0.0002498                    | 0.82792              |     |                   |              |
| Succinate dehydrogenase [ubiquinone] iron-sulfur subunit, mitochondrial                       | P21912   | SDHB         | 1.909098238                    | 0.86289577                 | 0.351269175       | +                    | 6.38489E-10 | 4.575E-08                    | 0.93375              |     |                   |              |

|                                                                                             |          |                    |              |              |             |   |             |           |         |   |   |
|---------------------------------------------------------------------------------------------|----------|--------------------|--------------|--------------|-------------|---|-------------|-----------|---------|---|---|
| NAD-dependent malic enzyme, mitochondrial                                                   | P23368   | ME2                | 1.83312467   | 0.97554671   | 0.42418824  | + | 1.87818E-06 | 4.148E-05 | 0.86875 |   |   |
| Tryptophan--tRNA ligase, cytoplasmic;T1-TrpRS;T2-TrpRS                                      | P23381   | WARS               | 1.7134092    | 3.268459067  | 4.735322654 | + | 2.65482E-12 | 1.022E-09 | 0.95458 |   |   |
| Acetyl-CoA acetyltransferase, mitochondrial                                                 | P24752   | ACAT1              | 1.4821644    | 0.678429527  | 0.447653907 | + | 1.60516E-12 | 7.065E-10 | 0.92125 |   |   |
| Protein S100-P                                                                              | P25815   | S100P              | -2.92594175  | -0.760023972 | 8.722603658 | + | 5.03922E-12 | 1.23E-09  | 0.96708 |   |   |
| Calreticulin                                                                                | P27797   | CALR               | 0.713930262  | 1.367061953  | 1.921549115 | + | 7.72455E-15 | 5.95E-12  | 0.97333 |   | + |
| Proteasome subunit beta type-6                                                              | P28072   | PSMB6              | -0.791586019 | -1.642730595 | 0.426926003 | + | 6.27087E-06 | 0.0001164 | 0.81083 |   | + |
| ATP-binding cassette sub-family D member 3                                                  | P28288   | ABCD3              | 0.800109694  | 0.154982647  | 0.524595989 | + | 1.88729E-06 | 4.148E-05 | 0.78    |   |   |
| Cytosol aminopeptidase                                                                      | P28838-2 | LAP3               | 1.01181689   | 1.883814153  | 2.391682906 | + | 5.42907E-09 | 2.835E-07 | 0.8825  |   |   |
| Phosphatidylethanolamine-binding protein 1;Hippocampal cholinergic neurostimulating peptide | P30086   | PEBP1              | 0.920429452  | 0.2201174    | 0.496430368 | + | 2.74794E-11 | 4.233E-09 | 0.96417 |   |   |
| Succinate dehydrogenase [ubiquinone] flavoprotein subunit, mitochondrial                    | P31040   | SDHA               | 1.715000143  | 0.869140716  | 0.429188344 | + | 5.36169E-11 | 7.182E-09 | 0.94625 |   |   |
| Protein S100-A11;Protein S100-A11, N-terminally processed                                   | P31949   | S100A11            | 1.35212052   | 2.08331      | 2.077550343 | + | 1.5439E-07  | 4.636E-06 | 0.88583 |   |   |
| Basigin                                                                                     | P35613-2 | BSG                | 0.910078943  | -0.236866384 | 0.31760547  | + | 2.44249E-15 | 2.965E-12 | 0.96708 |   | + |
| Estradiol 17-beta-dehydrogenase 2                                                           | P37059   | HSD17B2            | 2.604948247  | 0.157431     | 0.086508098 |   | 0.088142916 | 0.2787507 | 0.58396 | + |   |
| Electron transfer flavoprotein subunit beta                                                 | P38117   | ETFB               | 0.885648781  | 0.257392545  | 0.533521326 | + | 1.36908E-11 | 2.481E-09 | 0.92833 |   |   |
| Chloride anion exchanger                                                                    | P40879   | SLC26A3            | 2.599867533  | 0.48554245   | 0.120714734 | + | 0.001252887 | 0.0107226 | 0.94146 | + |   |
| Myeloid cell nuclear differentiation antigen                                                | P41218   | MNDA               | -0.79476818  | 0.82508669   | 5.052357017 |   | 0.052908917 | 0.1968563 | 0.7575  | + | + |
| Leucine-rich PPR motif-containing protein, mitochondrial                                    | P42704   | LRPPRC             | 0.746692695  | -0.043693415 | 0.453669595 | + | 3.01739E-11 | 4.402E-09 | 0.97708 |   |   |
| 3-ketoacyl-CoA thiolase, mitochondrial                                                      | P42765   | ACAA2              | 3.15515696   | 2.43730482   | 0.487798855 |   | 0.009985777 | 0.0563483 | 0.73417 |   |   |
| Nicotinamide phosphoribosyltransferase                                                      | P43490   | NAMPT;NA<br>MPTL   | 1.422982015  | 2.378392833  | 2.599738384 | + | 5.5869E-12  | 1.23E-09  | 0.98792 |   |   |
| Protein ERGIC-53                                                                            | P49257   | LMAN1              | 0.568826571  | 1.413402493  | 2.326990779 | + | 1.49128E-10 | 1.518E-08 | 0.97042 |   |   |
| Very long-chain specific acyl-CoA dehydrogenase, mitochondrial                              | P49748   | ACADVL             | 2.13845719   | 1.69700266   | 0.643100332 | + | 0.002234555 | 0.0169992 | 0.86021 |   |   |
| Serpin H1                                                                                   | P50454   | SERPINH1           | -0.415220353 | 0.317946462  | 2.08166242  | + | 2.03104E-07 | 6.017E-06 | 0.89375 |   |   |
| Trifunctional enzyme subunit beta, mitochondrial;3-ketoacyl-CoA thiolase                    | P55084   | HADHB              | 1.957892319  | 1.427219763  | 0.588209233 | + | 8.90816E-07 | 2.128E-05 | 0.88167 |   |   |
| Mesencephalic astrocyte-derived neurotrophic factor                                         | P55145   | MANF               | 1.117722385  | 2.1018127    | 2.675377027 | + | 1.00368E-10 | 1.173E-08 | 0.95452 |   |   |
| Galectin-4;Galectin                                                                         | P56470   | LGALS4             | 4.432913476  | 2.946310907  | 0.226139646 | + | 0.001865212 | 0.0150045 | 0.78583 |   |   |
| Beta-2-microglobulin;Beta-2-microglobulin form pl 5.3                                       | P61769   | B2M                | 4.200670429  | 4.639626367  | 1.551086942 |   | 0.071567132 | 0.2431625 | 0.67458 |   | + |
| Guanine nucleotide-binding protein G(I)/G(S)/G(O) subunit gamma-5                           | P63218   | GNL5               | -0.307080095 | 0.13874073   | 1.561771611 | + | 0.003167667 | 0.0225395 | 0.80583 |   |   |
| Vigilin                                                                                     | Q00341   | HDLBP              | 0.41845065   | 1.084213087  | 1.945973638 | + | 1.52696E-10 | 1.518E-08 | 0.91875 |   |   |
| Fatty acid-binding protein, epidermal                                                       | Q01469   | FABP5              | 1.486658857  | 0.35912244   | 0.323830057 | + | 2.88658E-15 | 2.965E-12 | 0.98875 |   |   |
| Transgelin                                                                                  | Q01995   | TAGLN              | 3.24510245   | 2.025499052  | 0.295347279 | + | 0.007563875 | 0.0447299 | 0.70375 |   |   |
| Proteasome activator complex subunit 1                                                      | Q06323   | PSME1              | 1.94315573   | 2.566905973  | 1.865912563 | + | 0.000447275 | 0.0044168 | 0.79417 |   | + |
| Cytoskeleton-associated protein 4                                                           | Q07065   | CKAP4              | 0.112868104  | 0.707096783  | 1.811633056 | + | 1.78534E-11 | 3.056E-09 | 0.95875 |   |   |
| Vesicular integral-membrane protein VIP36                                                   | Q12907   | LMAN2              | 1.51254443   | 2.058359533  | 1.726014689 | + | 4.53721E-05 | 0.0006461 | 0.85875 |   |   |
| Peroxioredoxin-4                                                                            | Q13162   | PRDX4              | -0.810515935 | 0.008916116  | 2.269210676 | + | 1.18938E-07 | 3.74E-06  | 0.92583 |   |   |
| Selenium-binding protein 1                                                                  | Q13228-4 | SELENBP1           | 3.379898324  | 1.945691604  | 0.238304331 | + | 0.00014645  | 0.0017354 | 0.72167 |   |   |
| Four and a half LIM domains protein 1                                                       | Q13642-1 | FHL1               | 1.954987286  | 1.161058857  | 0.452065396 | + | 8.69029E-06 | 0.0001513 | 0.86375 |   |   |
| Plastin-1                                                                                   | Q14651   | PLS1               | 2.35893444   | 1.72037508   | 0.52805261  |   | 0.082439    | 0.26513   | 0.59792 |   |   |
| Major vault protein                                                                         | Q14764   | MVP                | 2.112553967  | 1.708059701  | 0.667314209 |   | 0.296618883 | 0.6056248 | 0.54667 |   |   |
| Inorganic pyrophosphatase                                                                   | Q15181   | PPA1               | -0.129341148 | 0.468427867  | 1.818058211 | + | 3.14346E-11 | 4.402E-09 | 0.97542 |   |   |
| Zyxin                                                                                       | Q15942   | ZYX                | 0.735845932  | 1.25201609   | 1.675598069 | + | 0.000165454 | 0.0019457 | 0.79583 |   |   |
| Gamma-interferon-inducible protein 16                                                       | Q16666-3 | IFI16              | 1.450669025  | 1.3234362    | 0.88052864  |   | 0.807340673 | 0.8598939 | 0.58688 | + |   |
| Thiosulfate sulfurtransferase                                                               | Q16762   | TST                | 3.92543819   | 2.484794759  | 0.236775361 | + | 2.9835E-08  | 1.094E-06 | 0.86958 |   |   |
| Polymerase I and transcript release factor                                                  | Q6NZI2   | PTRF               | 2.55909665   | 1.70451974   | 0.425463162 | + | 6.38525E-05 | 0.000848  | 0.78292 |   |   |
| Thioredoxin domain-containing protein 5                                                     | Q86UY0   | TXNDC5             | 2.277128238  | 3.1334863    | 2.354569862 | + | 5.10727E-09 | 2.713E-07 | 0.9275  |   |   |
| Cell surface A33 antigen                                                                    | Q99795   | GPA33              | 2.695012929  | 2.219578923  | 0.621615213 |   | 0.18114987  | 0.4454863 | 0.6575  |   | + |
| Protein NipSnap homolog 1                                                                   | Q9BPW8   | NIPSNAP1           | -0.216223547 | -0.862284097 | 0.524106406 | + | 5.18319E-12 | 1.23E-09  | 0.94292 |   |   |
| Transmembrane emp24 domain-containing protein 9                                             | Q9BVK6   | TMED9              | 0.929013274  | 1.45272693   | 1.688285735 | + | 0.000129074 | 0.001547  | 0.90917 |   |   |
| Normal mucosa of esophagus-specific gene 1 protein                                          | Q9C002   | NMES1;C15<br>orf48 | 2.728755684  | 1.731369056  | 0.368842104 |   | 0.02596998  | 0.1157938 | 0.82104 | + |   |
| SRA stem-loop-interacting RNA-binding protein, mitochondrial                                | Q9GZT3-2 | SLIRP              | 0.88332976   | 0.060722202  | 0.439284699 | + | 2.32769E-11 | 3.775E-09 | 0.97375 |   |   |
| Succinyl-CoA ligase [ADP-forming] subunit beta, mitochondrial                               | Q9P2R7-2 | SUCLA2             | 1.151862181  | 0.570535385  | 0.559155988 | + | 8.26936E-06 | 0.0001456 | 0.7875  |   |   |
| 7-dehydrocholesterol reductase                                                              | Q9UBM7   | DHCR7              | -1.452937862 | -1.717782187 | 0.767325394 |   | 0.275315979 | 0.5780045 | 0.55188 |   |   |
| Cathepsin Z                                                                                 | Q9UBR2   | CTSZ               | 2.78740019   | 2.238636071  | 0.577663292 | + | 5.45672E-05 | 0.0007452 | 0.79917 |   |   |
| Deleted in malignant brain tumors 1 protein                                                 | Q9UGM3-5 | DMBT1              | 2.802335     | 3.462488826  | 1.935089979 |   | 0.131848775 | 0.3646554 | 0.72875 |   | + |

|                                                                                                                                   |        |       |              |              |             |   |             |           |         |  |   |
|-----------------------------------------------------------------------------------------------------------------------------------|--------|-------|--------------|--------------|-------------|---|-------------|-----------|---------|--|---|
| Proteasome activator complex subunit 2                                                                                            | Q9UL46 | PSME2 | 2.0514896    | 2.747714867  | 2.006165657 | + | 4.57424E-08 | 1.639E-06 | 0.84042 |  | + |
| Phosphoserine aminotransferase                                                                                                    | Q9Y617 | PSAT1 | -2.619195214 | -2.796671817 | 0.837380591 |   | 0.619037916 | 0.8598939 | 0.665   |  |   |
| Carboxypeptidase;Lysosomal protective protein;Lysosomal protective protein 32 kDa chain;Lysosomal protective protein 20 kDa chain | X6R5C5 | CTSA  | 1.769463963  | 1.236780357  | 0.587027503 | + | 0.001952924 | 0.0153886 | 0.82083 |  |   |
