# Supplementary material
Source: HighWire-hosted journal article supplement (https://gut.bmj.com/content/66/9/1573)
Supplement: inline-supplementary-material-8 [file inline-supplementary-material-8.pdf]

| Protein names                                                                                                   | Uniprot       | Gene names     | Discovery                       |                                 |             |                                      |                         |                      |         | Subgroup Specific | Immunological |
|-----------------------------------------------------------------------------------------------------------------|---------------|----------------|---------------------------------|---------------------------------|-------------|--------------------------------------|-------------------------|----------------------|---------|-------------------|---------------|
|                                                                                                                 |               |                | Average Log2 Ratio Discovery CD | Average Log2 Ratio Discovery UC | Ratio CD/UC | t-test CD vs UC Significant FDR 0.05 | t-test CD vs UC p value | FDR adjusted p value | AUC     |                   |               |
| Aconitate hydratase, mitochondrial                                                                              | A2A274        | ACO2           | 1.144986533                     | 1.66490304                      | 0.594570189 |                                      | 0.02817401              | 0.9032131            | 0.68667 |                   |               |
| Bone marrow proteoglycan;Eosinophil granule major basic protein                                                 | A6XMW0        | PRG2           | 5.007075286                     | 5.6249944                       | 0.539065004 |                                      | 0.07214806              | 1                    | 0.71778 | +                 |               |
| Calcium-activated chloride channel regulator 1                                                                  | A8K7I4        | CLCA1          | 1.90546252                      | 2.100129446                     | 0.823108769 |                                      | 0.77706668              | 1                    | 0.50556 |                   |               |
| Protein-glutamine gamma-glutamyltransferase 2                                                                   | B4DIT7        | TGM2           | 2.60735992                      | 2.96239643                      | 0.701147844 |                                      | 0.44179549              | 1                    | 0.58556 |                   |               |
| <b>Protein transport protein Sec61 subunit alpha isoform 1</b>                                                  | <b>B4DR61</b> | <b>SEC61A1</b> | 0.803108413                     | 1.054536753                     | 0.777689185 |                                      | 3.68E-02                | 1.00E+00             | 0.80333 | +                 |               |
| Heterogeneous nuclear ribonucleoprotein U-like protein 1                                                        | B7Z4B8        | HNRNPUL1       | 0.298444713                     | 0.140563095                     | 1.171027559 |                                      | 0.23420959              | 1                    | 0.55444 |                   |               |
| 2,4-dienoyl-CoA reductase, mitochondrial                                                                        | B7Z6B8        | DECR1          | 1.599104975                     | 1.515346027                     | 1.08736675  |                                      | 0.78658387              | 1                    | 0.68333 |                   |               |
| Medium-chain specific acyl-CoA dehydrogenase, mitochondrial                                                     | B7Z9I1        | ACADM          | 1.637631567                     | 1.100691613                     | 1.710763827 |                                      | 0.01523714              | 0.7532885            | 0.61333 |                   |               |
| Thymidine phosphorylase                                                                                         | C9JGI3        | TYMP           | 2.490408747                     | 2.38450124                      | 1.111719045 |                                      | 0.78722529              | 1                    | 0.50778 |                   |               |
| Prosaposin;Saposin-A;Saposin-B-Val;Saposin-B;Saposin-C;Saposin-D                                                | C9JIZ6        | PSAP           | 1.06057208                      | 0.994106753                     | 1.068723907 |                                      | 0.62763302              | 1                    | 0.53    |                   |               |
| Estradiol 17-beta-dehydrogenase 11                                                                              | D6RCD0        | HSD17B11       | 1.291166257                     | 1.078473893                     | 1.237004046 |                                      | 0.27049685              | 1                    | 0.58556 |                   |               |
| Adenosylhomocysteinase;Putative adenosylhomocysteinase 3                                                        | D7UEQ7        | AHCLY2         | 1.469503333                     | 1.202656739                     | 1.305840107 |                                      | 0.36957103              | 1                    | 0.55222 |                   |               |
| RNA-binding protein 39                                                                                          | E1P5S2        | RNPC2;RB M39   | -0.10937996                     | -0.17864213                     | 1.071717149 |                                      | 0.60466905              | 1                    | 0.55    |                   |               |
| CD44 antigen                                                                                                    | E7EPC6        | CD44           | 1.413578513                     | 1.824571393                     | 0.662991652 |                                      | 0.1370806               | 1                    | 0.66111 |                   |               |
| Bifunctional 3-phosphoadenosine 5-phosphosulfate synthase 2;Sulfate adenylyltransferase;Adenylyl-sulfate kinase | E7ER89        | PAPSS2         | 1.89527514                      | 2.019782093                     | 0.882932122 |                                      | 0.73073                 | 1                    | 0.53444 |                   |               |
| Calpastatin                                                                                                     | E7ESM9        | CAST           | 1.1441778                       | 1.155118421                     | 0.98911901  |                                      | 0.96763328              | 1                    | 0.52111 |                   |               |
| Mucin-2                                                                                                         | E7EUV1        | MUC2           | 2.131107886                     | 2.019875759                     | 1.117654314 |                                      | 0.86259009              | 1                    | 0.54333 |                   |               |
| Microtubule-associated protein;Microtubule-associated protein 4                                                 | E7EVA0        | MAP4           | -0.166096717                    | -0.36397962                     | 1.218819664 |                                      | 0.12188223              | 1                    | 0.65    |                   |               |
| Unconventional myosin-1b                                                                                        | E9PDF6        | MYO1B          | 0.73632734                      | 0.584623467                     | 1.163815549 |                                      | 0.20074848              | 1                    | 0.61111 |                   |               |
| Hydroxyacyl-coenzyme A dehydrogenase, mitochondrial                                                             | E9PF18        | HADH           | 1.85557158                      | 1.380916087                     | 1.607460321 |                                      | 0.01704383              | 0.7798487            | 0.64778 |                   |               |
| Hypoxia up-regulated protein 1                                                                                  | E9PL22        | HYOU1          | 1.38204928                      | 1.560936047                     | 0.83620058  |                                      | 0.11102218              | 1                    | 0.70778 |                   |               |
| CD59 glycoprotein                                                                                               | E9PNW4        | CD59           | 1.9632972                       | 1.847169267                     | 1.12313955  |                                      | 0.3647462               | 1                    | 0.51667 |                   |               |
| Copine-1                                                                                                        | F2Z2V0        | CPNE1          | -0.386152                       | -0.57096697                     | 1.202995826 |                                      | 0.39972719              | 1                    | 0.61556 |                   |               |
| Vacuolar protein sorting-associated protein 29                                                                  | F8VXU5        | VPS29          | 0.664994936                     | 0.513952436                     | 1.163046086 |                                      | 0.19847814              | 1                    | 0.66667 |                   |               |
| Tryptase alpha/beta-1;Tryptase beta-2                                                                           | F8W8D0        | TPSAB1;TPS B2  | 2.618945173                     | 2.993944067                     | 0.687290039 |                                      | 0.29887777              | 1                    | 0.63111 |                   |               |
| Caspase;Caspase-1;Caspase-1 subunit p20;Caspase-1 subunit p10                                                   | G3V169        | CASP1          | 2.907672357                     | 2.610092692                     | 1.346595647 |                                      | 0.41449294              | 1                    | 0.56556 | +                 |               |
| Epididymal secretory protein E1                                                                                 | G3V2V8        | NPC2           | 1.849518238                     | 1.520238157                     | 1.389967105 |                                      | 0.24865903              | 1                    | 0.6     |                   |               |
| Transforming growth factor-beta-induced protein ig-h3                                                           | G8JLA8        | TGFB1          | 3.187355                        | 3.4042268                       | 0.805033168 |                                      | 0.38387956              | 1                    | 0.57889 |                   |               |
| NADH dehydrogenase [ubiquinone] 1 alpha subcomplex subunit 13                                                   | J3KN00        | NDUFA13        | 0.88193582                      | 1.081268864                     | 0.819276992 |                                      | 0.2008033               | 1                    | 0.62889 |                   |               |
| Myosin regulatory light chain 12A;Myosin regulatory light chain 12B                                             | J3QRS3        | MYL12A;M YL12B | 1.735188558                     | 1.712337586                     | 1.023114056 |                                      | 0.94376586              | 1                    | 0.51    |                   |               |
| PDZ and LIM domain protein 1                                                                                    | O00151        | PDLIM1         | 1.164587007                     | 1.328209573                     | 0.849062426 |                                      | 0.14828969              | 1                    | 0.59889 |                   |               |
| Programmed cell death protein 5                                                                                 | O14737        | PDCD5          | -0.536456687                    | -0.87150414                     | 1.398006724 |                                      | 0.05604133              | 1                    | 0.70222 |                   |               |
| Cytochrome b-c1 complex subunit 8                                                                               | O14949        | UQCRCQ         | 1.279111087                     | 1.106560331                     | 1.188332134 |                                      | 0.50107781              | 1                    | 0.59667 |                   |               |
| Actin-related protein 2/3 complex subunit 3                                                                     | O15145        | ARPC3          | 1.855291333                     | 1.992801267                     | 0.871525693 |                                      | 0.3865552               | 1                    | 0.58333 |                   |               |
| Actin-related protein 2/3 complex subunit 5                                                                     | O15511        | ARPC5          | 2.620132533                     | 2.23348518                      | 1.472037291 |                                      | 0.07052595              | 1                    | 0.63556 |                   |               |
| D-3-phosphoglycerate dehydrogenase                                                                              | O43175        | PHGDH          | -2.458144533                    | -2.45886696                     | 1.000722688 |                                      | 0.99726946              | 1                    | 0.53111 |                   |               |
| Aflatoxin B1 aldehyde reductase member 2                                                                        | O43488        | AKR7A2         | 1.074949015                     | 0.874413759                     | 1.222056696 |                                      | 0.33718358              | 1                    | 0.59556 |                   |               |
| Calumenin                                                                                                       | O43852-3      | CALU           | 0.010228581                     | 0.29308178                      | 0.753630414 |                                      | 0.07363832              | 1                    | 0.71556 |                   |               |
| Aldo-keto reductase family 1 member B10                                                                         | O60218        | AKR1B10        | 1.320118825                     | 1.29532768                      | 1.025101001 |                                      | 0.95023614              | 1                    | 0.54111 |                   |               |
| Sorting nexin-3                                                                                                 | O60493        | SNX3           | 1.25348948                      | 1.048357753                     | 1.227686773 |                                      | 0.05689622              | 1                    | 0.64389 |                   |               |
| GDP-mannose 4,6 dehydratase                                                                                     | O60547        | GMDS           | 2.52535785                      | 2.759630647                     | 0.791145964 |                                      | 0.69376098              | 1                    | 0.56    |                   |               |
| Zymogen granule membrane protein 16                                                                             | O60844        | ZG16           | 2.51504308                      | 2.6526916                       | 0.871404919 |                                      | 0.86204748              | 1                    | 0.60667 | +                 |               |
| Endothelial differentiation-related factor 1                                                                    | O60869        | EDF1           | -0.919154113                    | -0.84404089                     | 0.927638447 |                                      | 0.57060456              | 1                    | 0.64667 |                   |               |
| Rho-associated protein kinase 2                                                                                 | O75116        | ROCK2          | 0.039042662                     | 0.162087536                     | 0.884223983 |                                      | 0.52508046              | 1                    | 0.62222 |                   |               |
| NADH dehydrogenase [ubiquinone] iron-sulfur protein 2, mitochondrial                                            | O75306-2      | NDUFS2         | 0.632808663                     | 0.882775814                     | 0.778826366 |                                      | 0.13834962              | 1                    | 0.70444 |                   |               |
| SH3 domain-binding glutamic acid-rich-like protein                                                              | O75368        | SH3BGR1        | 1.913139384                     | 1.850597986                     | 1.064538528 |                                      | 0.84702249              | 1                    | 0.58111 |                   |               |
| Vesicle-trafficking protein SEC22b                                                                              | O75396        | SEC22B         | 1.178858467                     | 1.354270673                     | 0.839111062 |                                      | 0.11196304              | 1                    | 0.56278 |                   |               |
| Mitochondrial-processing peptidase subunit beta                                                                 | O75439        | PMPCB          | -0.037847567                    | -0.24857112                     | 1.234571009 |                                      | 0.17202475              | 1                    | 0.62111 |                   |               |

|                                                                                                                           |          |           |              |             |             |  |            |           |         |  |   |
|---------------------------------------------------------------------------------------------------------------------------|----------|-----------|--------------|-------------|-------------|--|------------|-----------|---------|--|---|
| PC4 and SFRS1-interacting protein                                                                                         | O75475   | PSIP1     | -0.142063709 | -0.37445203 | 1.261609539 |  | 0.08687707 | 1         | 0.62444 |  |   |
| Acyl-protein thioesterase 1                                                                                               | O75608-2 | LYPLA1    | 1.503975267  | 1.211071507 | 1.340313792 |  | 0.01233814 | 0.7357828 | 0.64222 |  |   |
| ATP synthase subunit d, mitochondrial                                                                                     | O75947-2 | ATP5H     | 1.364722942  | 1.14460638  | 1.246230057 |  | 0.06558474 | 1         | 0.69222 |  |   |
| Ribosomal L1 domain-containing protein 1                                                                                  | O76021   | RSL1D1    | -1.095871746 | -1.32567067 | 1.258346957 |  | 0.08765339 | 1         | 0.62333 |  |   |
| Signal recognition particle subunit SRP72                                                                                 | O76094   | SRP72     | 0.218844253  | 0.451078897 | 0.792760085 |  | 0.05984878 | 1         | 0.66778 |  |   |
| N(G),N(G)-dimethylarginine dimethylaminohydrolase 1                                                                       | O94760   | DDAH1     | 1.031108491  | 1.09954652  | 0.93385133  |  | 0.73918036 | 1         | 0.58889 |  |   |
| Metastasis-associated protein MTA2                                                                                        | O94776   | MTA2      | -0.395286107 | -0.32082368 | 0.928242349 |  | 0.59247752 | 1         | 0.52889 |  |   |
| Unconventional myosin-IId                                                                                                 | O94832   | MYO1D     | 0.438686938  | 0.258355465 | 1.197614274 |  | 0.64508545 | 1         | 0.50667 |  |   |
| NADH dehydrogenase [ubiquinone] 1 beta subcomplex subunit 4                                                               | O95168   | NDUFB4    | 0.889891814  | 0.974202793 | 0.919145377 |  | 0.63101058 | 1         | 0.63444 |  |   |
| 6-phosphogluconolactonase                                                                                                 | O95336   | PGLS      | 0.882681467  | 0.646775587 | 1.266055143 |  | 0.00813892 | 0.7357828 | 0.68667 |  |   |
| N(G),N(G)-dimethylarginine dimethylaminohydrolase 2                                                                       | O95865   | DDAH2     | 0.332211833  | 0.672286453 | 0.711717212 |  | 0.12831202 | 1         | 0.56333 |  |   |
| Alcohol dehydrogenase 1C                                                                                                  | P00326   | ADH1C     | 2.307988064  | 2.750384253 | 0.642495036 |  | 0.3156131  | 1         | 0.5     |  |   |
| Glutathione reductase, mitochondrial                                                                                      | P00390-2 | GSR       | 0.205073139  | -0.04241416 | 1.28080309  |  | 0.00316493 | 0.7357828 | 0.65111 |  |   |
| Purine nucleoside phosphorylase                                                                                           | P00491   | PNP       | 1.19637272   | 1.026311067 | 1.185377932 |  | 0.18087478 | 1         | 0.56222 |  | + |
| Haptoglobin;Haptoglobin alpha chain;Haptoglobin beta chain                                                                | P00738   | HP        | 3.785743057  | 2.9897688   | 2.216599482 |  | 0.0987062  | 1         | 0.66222 |  |   |
| Argininosuccinate synthase                                                                                                | P00966   | ASS1      | 1.287056436  | 1.860563773 | 0.563545425 |  | 0.13124355 | 1         | 0.60889 |  |   |
| Alpha-1-antitrypsin;Short peptide from AAT                                                                                | P01009   | SERPINA1  | 3.451303707  | 3.15738314  | 1.341677326 |  | 0.58722709 | 1         | 0.54556 |  |   |
| Alpha-2-macroglobulin                                                                                                     | P01023   | A2M       | 2.374543133  | 2.147234827 | 1.2552168   |  | 0.65280227 | 1         | 0.54111 |  |   |
| Complement C3                                                                                                             | P01024   | C3        | 1.498698745  | 1.057638239 | 1.554354748 |  | 0.37498352 | 1         | 0.52    |  | + |
| Immunoglobulin J chain                                                                                                    | P01591   | IGJ       | 2.486558973  | 2.755359807 | 0.764295463 |  | 0.61537076 | 1         | 0.54111 |  | + |
| Polymeric immunoglobulin receptor;Secretory component                                                                     | P01833   | PIGR      | 2.21206495   | 2.78082734  | 0.566225772 |  | 0.18782033 | 1         | 0.51056 |  | + |
| Ig gamma-1 chain C region                                                                                                 | P01857   | IGHG1     | 4.420894867  | 3.793748853 | 1.872259543 |  | 0.44723751 | 1         | 0.54333 |  | + |
| Ig gamma-3 chain C region                                                                                                 | P01860   | IGHG3     | 2.840880214  | 3.414344667 | 0.563569593 |  | 0.05022774 | 1         | 0.68111 |  | + |
| Ig alpha-1 chain C region                                                                                                 | P01876   | IGHA1     | 3.61858414   | 4.4253002   | 0.446321355 |  | 0.19170063 | 1         | 0.61    |  | + |
| Hemoglobin subunit delta                                                                                                  | P02042   | HBD       | 3.331076568  | 2.974020786 | 1.429115587 |  | 0.37682604 | 1         | 0.52667 |  |   |
| Prelamin-A/C;Lamin-A/C                                                                                                    | P02545   | LMNA      | 1.241832467  | 1.37793732  | 0.872751117 |  | 0.2525185  | 1         | 0.57333 |  |   |
| Apolipoprotein A-I;Proapolipoprotein A-I;Truncated apolipoprotein A-I                                                     | P02647   | APOA1     | 2.651557067  | 2.535442447 | 1.123124597 |  | 0.77651368 | 1         | 0.53444 |  |   |
| Fibrinogen alpha chain;Fibrinopeptide A;Fibrinogen alpha chain                                                            | P02671-2 | FGA       | 2.494662867  | 1.955238792 | 1.715018855 |  | 0.23547283 | 1         | 0.69556 |  |   |
| Fibrinogen beta chain;Fibrinopeptide B;Fibrinogen beta chain                                                              | P02675   | FBG       | 2.627540439  | 2.364909847 | 1.300346273 |  | 0.48473744 | 1         | 0.59556 |  |   |
| Fibrinogen gamma chain                                                                                                    | P02679-2 | FGG       | 2.41094392   | 2.6897141   | 0.756713791 |  | 0.70438483 | 1         | 0.52111 |  |   |
| Transferrin receptor protein 1;Transferrin receptor protein 1, serum form                                                 | P02786   | TFRC      | 0.187910367  | -0.21053853 | 1.489512515 |  | 0.0079363  | 0.7357828 | 0.74222 |  |   |
| Serotransferrin                                                                                                           | P02787   | TF        | 2.002562214  | 3.922079953 | 0.146677682 |  | 0.00197893 | 0.7357828 | 0.74778 |  |   |
| Metallothionein-2                                                                                                         | P02795   | MT2A      | 0.378706793  | -0.54375577 | 2.515477283 |  | 0.00250423 | 0.7357828 | 0.76667 |  |   |
| Cystatin-B                                                                                                                | P04080   | CSTB      | 2.795516     | 2.601669733 | 1.21390965  |  | 0.3951345  | 1         | 0.53444 |  |   |
| Superoxide dismutase [Mn], mitochondrial                                                                                  | P04179-4 | SOD2      | 3.170022373  | 3.8990488   | 0.482378392 |  | 0.11214759 | 1         | 0.54222 |  |   |
| Ornithine aminotransferase, mitochondrial;Ornithine aminotransferase, hepatic form;Ornithine aminotransferase, renal form | P04181   | OAT       | -1.448139421 | -1.27009787 | 0.836907649 |  | 0.37772624 | 1         | 0.56333 |  |   |
| Aldehyde dehydrogenase, mitochondrial                                                                                     | P05091   | ALDH2     | 2.273321267  | 1.987115733 | 1.331366067 |  | 0.09230904 | 1         | 0.61222 |  |   |
| Protein S100-A8;Protein S100-A8, N-terminally processed                                                                   | P05109   | S100A8    | 4.1510472    | 3.748192873 | 1.496088936 |  | 0.54199877 | 1         | 0.5     |  |   |
| HLA class I histocompatibility antigen, A-24 alpha chain                                                                  | P05534   | HLA-A     | 2.759320132  | 1.8697824   | 2.434004229 |  | 0.10657638 | 1         | 0.59    |  | + |
| Myosin light chain 1/3, skeletal muscle isoform;Myosin light chain 3                                                      | P05976-2 | MYL1;MYL3 | 1.71646014   | 1.930394667 | 0.807401247 |  | 0.26747016 | 1         | 0.58889 |  |   |
| Cyclin-dependent kinase 1                                                                                                 | P06493   | CDK1      | 0.185746417  | -0.17283446 | 1.431296793 |  | 0.50553376 | 1         | 0.54222 |  | + |
| ATP synthase subunit beta, mitochondrial;ATP synthase subunit beta                                                        | P06576   | ATP5B     | 1.41654432   | 1.21166184  | 1.227380815 |  | 0.03988371 | 1         | 0.73889 |  |   |
| Protein S100-A9                                                                                                           | P06702   | S100A9    | 3.91678564   | 4.094965067 | 0.836792267 |  | 0.73460196 | 1         | 0.57333 |  |   |
| Acyl-CoA-binding protein                                                                                                  | P07108   | DBI       | 0.135240861  | -0.15593803 | 1.338003924 |  | 0.05137219 | 1         | 0.68056 |  |   |
| Histone H1.0;Histone H1.0, N-terminally processed                                                                         | P07305   | H1FO      | 1.172161673  | 0.880612656 | 1.338499242 |  | 0.05341361 | 1         | 0.67889 |  |   |
| Cathepsin B;Cathepsin B light chain;Cathepsin B heavy chain                                                               | P07858   | CTSB      | 2.7820814    | 2.536941853 | 1.277799613 |  | 0.27405633 | 1         | 0.58889 |  | + |
| Heat shock 70 kDa protein 1A/1B                                                                                           | P08107   | HSPA1A    | -1.035090227 | -1.34523959 | 1.363628771 |  | 0.00914847 | 0.7357828 | 0.71833 |  |   |
| Collagen alpha-2(I) chain                                                                                                 | P08123   | COL1A2    | 2.487110535  | 2.794871009 | 0.735091371 |  | 0.55705155 | 1         | 0.60333 |  | + |
| Cathepsin G                                                                                                               | P08311   | CTSG      | 3.5938794    | 4.0360416   | 0.64264539  |  | 0.18742352 | 1         | 0.55667 |  | + |
| U1 small nuclear ribonucleoprotein A                                                                                      | P09012   | SNRPA     | -0.277679437 | -0.53507236 | 1.293553294 |  | 0.0049261  | 0.7357828 | 0.68556 |  |   |
| Dihydropteridine reductase                                                                                                | P09417-2 | QDPR      | 0.461598024  | 0.103449734 | 1.430677761 |  | 0.01347731 | 0.7532885 | 0.73556 |  |   |
| Leukotriene A-4 hydrolase                                                                                                 | P09960   | LTA4H     | 1.1547803    | 0.953233147 | 1.223293918 |  | 0.0460477  | 1         | 0.77778 |  |   |
| Ig lambda-2 chain C regions                                                                                               | P0CG05   | IGLC2     | 4.022860333  | 3.43488546  | 1.800338807 |  | 0.2579804  | 1         | 0.51    |  | + |
| Histone H1.4                                                                                                              | P10412   | HIST1H1E  | 1.684071267  | 1.512829593 | 1.186777527 |  | 0.12547791 | 1         | 0.61222 |  |   |
| S-formylglutathione hydrolase                                                                                             | P10768   | ESD       | 0.426259693  | 0.197457156 | 1.257093785 |  | 0.02065568 | 0.8616258 | 0.68111 |  |   |
| Laminin subunit gamma-1                                                                                                   | P11047   | LAMC1     | 0.642189894  | 2.117212621 | 0.228773528 |  | 0.00293534 | 0.7357828 | 0.60333 |  |   |
| Pyruvate carboxylase, mitochondrial                                                                                       | P11498   | PC        | -2.06568566  | -2.23563113 | 1.185240222 |  | 0.57444974 | 1         | 0.55556 |  |   |

|                                                                                                                   |          |               |              |             |             |  |            |           |         |  |   |
|-------------------------------------------------------------------------------------------------------------------|----------|---------------|--------------|-------------|-------------|--|------------|-----------|---------|--|---|
| Eosinophil peroxidase;Eosinophil peroxidase light chain;Eosinophil peroxidase heavy                               | P11678   | EPX           | 3.05481534   | 2.656997249 | 1.48857322  |  | 0.48764177 | 1         | 0.54667 |  |   |
| Collagen alpha-1(VI) chain                                                                                        | P12109   | COL6A1        | 3.109749927  | 2.866021347 | 1.275997952 |  | 0.68706304 | 1         | 0.54444 |  |   |
| Collagen alpha-2(VI) chain                                                                                        | P12110   | COL6A2        | 2.203315276  | 2.802650195 | 0.549176762 |  | 0.24433501 | 1         | 0.56    |  |   |
| ADP/ATP translocase 3;ADP/ATP translocase 3, N-terminally processed                                               | P12236   | SLC25A6       | 1.023645493  | 1.192360927 | 0.844749256 |  | 0.22761881 | 1         | 0.53333 |  |   |
| Creatine kinase B-type                                                                                            | P12277   | CKB           | -1.046308337 | -1.68704404 | 1.897876639 |  | 0.0703287  | 1         | 0.69444 |  |   |
| Creatine kinase U-type, mitochondrial                                                                             | P12532   | CKMT1A;CKMT1B | 3.064999936  | 2.677043573 | 1.473965463 |  | 0.29449527 | 1         | 0.60556 |  |   |
| Eosinophil cationic protein                                                                                       | P12724   | RNASE3        | 4.1749252    | 4.906740087 | 0.481035173 |  | 0.16652257 | 1         | 0.70222 |  |   |
| Proto-oncogene tyrosine-protein kinase Src                                                                        | P12931-2 | SRC           | 1.154280215  | 0.302457592 | 2.343915035 |  | 0.00578399 | 0.7357828 | 0.69222 |  | + |
| Cytochrome c oxidase subunit 4 isoform 1, mitochondrial                                                           | P13073   | COX4I1        | 1.391776667  | 1.195854487 | 1.216432239 |  | 0.26661024 | 1         | 0.63222 |  |   |
| Plastin-3                                                                                                         | P13797   | PLS3          | -1.849551267 | -2.03461879 | 1.203299692 |  | 0.40190553 | 1         | 0.53111 |  |   |
| Junction plakoglobin                                                                                              | P14923   | JUP           | 1.713128929  | 1.464194953 | 1.282657343 |  | 0.3429442  | 1         | 0.59556 |  |   |
| Aminopeptidase N                                                                                                  | P15144   | ANPEP         | 1.64598336   | 1.969085079 | 0.723900217 |  | 0.36631675 | 1         | 0.52333 |  |   |
| Desmoplakin                                                                                                       | P15924   | DSP           | 1.14200096   | 1.36260508  | 0.802034127 |  | 0.37427281 | 1         | 0.58    |  |   |
| Replication protein A 32 kDa subunit                                                                              | P15927   | RPA2          | -0.18363795  | -0.42071611 | 1.267540183 |  | 0.08180911 | 1         | 0.55389 |  |   |
| Integrin beta-4                                                                                                   | P16144-4 | ITGB4         | 1.248838992  | 0.548731513 | 2.013969155 |  | 0.13571677 | 1         | 0.61222 |  |   |
| Histone H1.3                                                                                                      | P16402   | HIST1H1D      | 1.309686227  | 1.24571864  | 1.066057844 |  | 0.60294419 | 1         | 0.55667 |  |   |
| Desmin                                                                                                            | P17661   | DES           | 2.1216508    | 2.831671293 | 0.491634122 |  | 0.07357981 | 1         | 0.63111 |  |   |
| Galectin-3;Galectin                                                                                               | P17931   | LGALS3        | 3.930684333  | 3.762947267 | 1.182625618 |  | 0.65481064 | 1         | 0.57444 |  | + |
| Vinculin                                                                                                          | P18206-2 | VCL           | 1.389026     | 1.627163027 | 0.788094694 |  | 0.10859917 | 1         | 0.64444 |  |   |
| Spermidine synthase                                                                                               | P19623   | SRM           | -0.168659913 | -0.05751679 | 0.894810673 |  | 0.45047471 | 1         | 0.65889 |  |   |
| Cysteine and glycine-rich protein 1                                                                               | P21291   | CSR1          | 1.675121507  | 2.508085    | 0.43475897  |  | 0.01479675 | 0.7532885 | 0.65778 |  |   |
| Filamin-A                                                                                                         | P21333-2 | FLNA          | 1.457773433  | 1.77430172  | 0.728674399 |  | 0.11193771 | 1         | 0.64    |  |   |
| Amine oxidase [flavin-containing] A                                                                               | P21397   | MAOA          | 1.54675722   | 1.337897636 | 1.232271956 |  | 0.56382061 | 1         | 0.65111 |  |   |
| Cytoplasmic aconitate hydratase                                                                                   | P21399   | ACO1;IRP1     | 1.11843716   | 1.33014102  | 0.8092043   |  | 0.43097047 | 1         | 0.56889 |  |   |
| Succinate dehydrogenase [ubiquinone] iron-sulfur subunit, mitochondrial                                           | P21912   | SDHB          | 0.840156493  | 0.885635047 | 0.955540095 |  | 0.8340395  | 1         | 0.62667 |  |   |
| Tryptophan--tRNA ligase, cytoplasmic;T1-TrpRS;T2-TrpRS                                                            | P23381   | WARS          | 3.4913054    | 3.045612733 | 1.56157147  |  | 0.08162222 | 1         | 0.74    |  |   |
| DnaI homolog subfamily B member 1                                                                                 | P25685   | DNAJB1        | -0.464871787 | -0.79780575 | 1.395055166 |  | 0.15558756 | 1         | 0.65333 |  |   |
| Protein S100-P                                                                                                    | P25815   | S100P         | -0.706814447 | -0.8132335  | 1.112287884 |  | 0.76217672 | 1         | 0.56778 |  |   |
| Moiesin                                                                                                           | P26038   | MSN           | 1.222433553  | 1.361660193 | 0.870030822 |  | 0.39154341 | 1         | 0.53556 |  | + |
| Isovaleryl-CoA dehydrogenase, mitochondrial                                                                       | P26440   | IVD           | 1.002378849  | 1.3501186   | 0.706282661 |  | 0.25116949 | 1         | 0.52778 |  |   |
| Peptidyl-prolyl cis-trans isomerase FKBP2;Peptidyl-prolyl cis-trans isomerase                                     | P26885   | FKBP2         | 1.704019997  | 1.873528407 | 0.844079656 |  | 0.38662407 | 1         | 0.61889 |  |   |
| Proteasome subunit beta type-8                                                                                    | P28062   | PSMB8         | 2.352823686  | 3.255225786 | 0.405594211 |  | 0.042568   | 1         | 0.57778 |  | + |
| NADH-ubiquinone oxidoreductase 75 kDa subunit, mitochondrial                                                      | P28331   | NDUFS1        | 0.991160412  | 0.94974788  | 1.042281992 |  | 0.85086621 | 1         | 0.65    |  |   |
| Granulins;Acrogranin;Paragranulin;Granulin-1;Granulin-2;Granulin-3;Granulin-4;Granulin-5;Granulin-6;Granulin-7    | P28799   | GRN           | 2.113040393  | 1.968579133 | 1.155416933 |  | 0.54525536 | 1         | 0.50889 |  |   |
| Cytosol aminopeptidase                                                                                            | P28838-2 | LAP3          | 2.155688867  | 1.61193944  | 1.722452981 |  | 1.35E-03   | 7.36E-01  | 0.78111 |  |   |
| Myristoylated alanine-rich C-kinase substrate                                                                     | P29966   | MARCKS        | -0.041744802 | -0.28562984 | 1.276197603 |  | 0.12040713 | 1         | 0.67889 |  |   |
| Flavin reductase (NADPH)                                                                                          | P30043   | BLVRB         | 1.138092653  | 0.741653127 | 1.48652254  |  | 0.00303055 | 0.7357828 | 0.69    |  |   |
| Peroxisome oxidin-5, mitochondrial                                                                                | P30044-2 | PRDX5         | 2.037289429  | 1.713507733 | 1.382345502 |  | 0.02812784 | 0.9032131 | 0.74    |  |   |
| Leukocyte elastase inhibitor                                                                                      | P30740   | SERP1B1       | 2.350558967  | 2.456027467 | 0.899902819 |  | 0.64721503 | 1         | 0.5     |  |   |
| Coronin-1A;Coronin                                                                                                | P31146   | CORO1A        | 2.51582618   | 2.360352893 | 1.16821073  |  | 0.78170013 | 1         | 0.51667 |  | + |
| Heterogeneous nuclear ribonucleoprotein H3                                                                        | P31942-2 | HNRNPH3       | -0.039358703 | -0.28605784 | 1.279794007 |  | 0.00652231 | 0.7357828 | 0.75    |  |   |
| Deoxyuridine 5-triphosphate nucleotidohydrolase, mitochondrial                                                    | P33316-2 | DUT           | -0.585130183 | -0.86244443 | 1.319580979 |  | 0.19118058 | 1         | 0.55889 |  |   |
| DNA replication licensing factor MCM4                                                                             | P33991   | MCM4          | -1.5925416   | -1.50789613 | 0.918837979 |  | 0.66291829 | 1         | 0.54778 |  |   |
| DNA replication licensing factor MCM7                                                                             | P33993   | MCM7          | -1.587810526 | -1.43564163 | 0.858843212 |  | 0.44602691 | 1         | 0.63111 |  |   |
| Serpin B6                                                                                                         | P35237   | SERP1B6       | 1.641845165  | 1.640440013 | 1.001406139 |  | 0.99586904 | 1         | 0.53556 |  |   |
| Fibrillin-1                                                                                                       | P35555   | FBN1          | 2.236881702  | 2.361321457 | 0.882991456 |  | 0.78908317 | 1         | 0.55111 |  |   |
| Myosin-11                                                                                                         | P35749   | MYH11         | 1.324271119  | 1.279379705 | 1.045914281 |  | 0.90790494 | 1         | 0.59111 |  |   |
| Glutaredoxin-1                                                                                                    | P35754   | GLRX          | 1.331802158  | 2.164750603 | 0.434765512 |  | 0.05535333 | 1         | 0.61    |  |   |
| V-type proton ATPase subunit E 1                                                                                  | P36543   | ATP6V1E1      | 0.547568881  | 0.382612813 | 1.179341307 |  | 0.19716016 | 1         | 0.58    |  |   |
| Dihydropyridyllysine-residue succinyltransferase component of 2-oxoglutarate dehydrogenase complex, mitochondrial | P36957   | DLST          | 1.27567948   | 0.833191513 | 1.556575112 |  | 0.04222118 | 1         | 0.56556 |  |   |
| Macrophage-capping protein                                                                                        | P40121   | CAPG          | 2.091492867  | 1.8173174   | 1.315445599 |  | 0.08798179 | 1         | 0.50444 |  |   |
| Signal transducer and activator of transcription 1-alpha/beta;Signal transducer and activator of transcription    | P42224   | STAT1         | 2.2052205    | 1.41053956  | 2.21373457  |  | 0.08091806 | 1         | 0.67556 |  |   |
| Aldo-keto reductase family 1 member C3                                                                            | P42330   | AKR1C3        | -0.208725817 | 0.009117315 | 0.804251593 |  | 0.23581903 | 1         | 0.65444 |  |   |
| 3-ketoacyl-CoA thiolase, mitochondrial                                                                            | P42765   | ACAA2         | 2.471749013  | 2.402860627 | 1.071316629 |  | 0.81995898 | 1         | 0.54889 |  |   |

|                                                                                                        |               |                   |                    |                    |                    |  |                   |                  |                |  |   |
|--------------------------------------------------------------------------------------------------------|---------------|-------------------|--------------------|--------------------|--------------------|--|-------------------|------------------|----------------|--|---|
| Glycerol-3-phosphate dehydrogenase, mitochondrial                                                      | P43304        | GPD2              | 0.679290813        | 0.454322017        | 1.252283639        |  | 0.24240953        | 1                | 0.68667        |  |   |
| Nicotinamide phosphoribosyltransferase                                                                 | P43490        | NAMPT;NA<br>MPTL  | 2.543826133        | 2.212959533        | 1.392174064        |  | 0.03474349        | 0.9770699        | 0.63778        |  |   |
| Serpin H1                                                                                              | P50454        | SERPINH1          | 0.438587354        | 0.197305571        | 1.272879661        |  | 0.21064258        | 1                | 0.515          |  |   |
| Vasodilator-stimulated phosphoprotein                                                                  | P50552        | VASP              | 1.173225493        | 1.347533773        | 0.840037891        |  | 0.23817266        | 1                | 0.53222        |  | + |
| Translocon-associated protein subunit delta                                                            | P51571        | SSR4              | 1.16333986         | 1.3805675          | 0.804746756        |  | 0.18112158        | 1                | 0.71778        |  |   |
| Spermine synthase                                                                                      | P52788        | SMS               | -1.320766687       | -1.4406599         | 1.127376459        |  | 0.47262633        | 1                | 0.65889        |  |   |
| <b>Tricarboxylate transport protein, mitochondrial</b>                                                 | <b>P53007</b> | <b>SLC25A1</b>    | <b>0.504110373</b> | <b>0.266347328</b> | <b>1.268408601</b> |  | <b>0.05528265</b> | <b>1</b>         | <b>0.76556</b> |  |   |
| <b>Trifunctional enzyme subunit beta, mitochondrial;3-ketoacyl-CoA thiolase</b>                        | <b>P55084</b> | <b>HADHB</b>      | <b>1.53717688</b>  | <b>1.317262647</b> | <b>1.245969863</b> |  | <b>0.05546595</b> | <b>1</b>         | <b>0.80889</b> |  |   |
| Succinyl-CoA:3-ketoacid coenzyme A transferase 1, mitochondrial                                        | P55809        | OXCT1             | 0.70445942         | 0.545427507        | 1.17237536         |  | 0.274692          | 1                | 0.57444        |  |   |
| ATP synthase subunit epsilon, mitochondrial;ATP synthase subunit epsilon-like protein, mitochondrial   | P56381        | ATP5E;ATP5<br>EP2 | 0.671110614        | 0.5701932          | 1.106185283        |  | 0.62082047        | 1                | 0.69444        |  |   |
| Galectin-4;Galectin                                                                                    | P56470        | LGALS4            | 3.057347271        | 2.842676967        | 1.239453188        |  | 0.71012031        | 1                | 0.51889        |  |   |
| Neutrophil defensin 3;HP 3-56;Neutrophil defensin 2                                                    | P59666        | DEFA3             | 5.0440256          | 5.102531667        | 0.943172518        |  | 0.88028626        | 1                | 0.51889        |  | + |
| Destrin                                                                                                | P60981        | DSTN              | 0.61530416         | 0.782005324        | 0.846452524        |  | 0.19057243        | 1                | 0.62556        |  |   |
| Ras-related protein Rab-2A                                                                             | P61019        | RAB2A             | 1.289476367        | 1.117909987        | 1.187162944        |  | 0.16052991        | 1                | 0.59333        |  |   |
| NEDD8-conjugating enzyme Ubc12                                                                         | P61081        | UBE2M             | -0.923984047       | -0.72296975        | 0.817900741        |  | 0.11621881        | 1                | 0.56111        |  |   |
| <b>Beta-2-microglobulin;Beta-2-microglobulin form pl 5.3</b>                                           | <b>P61769</b> | <b>B2M</b>        | <b>5.121450133</b> | <b>4.1578026</b>   | <b>2.621240118</b> |  | <b>0.00241265</b> | <b>0.7357828</b> | <b>0.74</b>    |  | + |
| Thymosin beta-4;Hematopoietic system regulatory peptide                                                | P62328        | TMSB4X            | 3.969946933        | 4.022406247        | 0.948892928        |  | 0.90640072        | 1                | 0.52444        |  |   |
| Guanine nucleotide-binding protein G(i1)/G(s)/G(o) subunit gamma-5                                     | P63218        | GNB5              | 0.234077795        | 0.043403665        | 1.210065064        |  | 0.18610056        | 1                | 0.72556        |  |   |
| Thymosin beta-10                                                                                       | P63313        | TMSB10            | 0.457788007        | 0.073946397        | 1.46791292         |  | 0.00568172        | 0.7357828        | 0.72667        |  |   |
| Tropomyosin alpha-4 chain                                                                              | P67936        | TPM4              | 1.437665607        | 1.681920067        | 0.783288293        |  | 0.09605152        | 1                | 0.65444        |  |   |
| Tubulin alpha-4A chain                                                                                 | P68366-2      | TUBA4A            | 2.163309162        | 1.895199213        | 1.307490888        |  | 0.60934288        | 1                | 0.52556        |  |   |
| Hemoglobin subunit alpha                                                                               | P69905        | HBA1              | 5.5173266          | 5.178075733        | 1.403895492        |  | 0.37374018        | 1                | 0.52444        |  |   |
| Basement membrane-specific heparan sulfate proteoglycan core protein;Endorepellin;LG3 peptide          | P98160        | HSPG2             | 2.54881244         | 2.002283953        | 1.727246439        |  | 0.20936771        | 1                | 0.61889        |  | + |
| Transcription factor A, mitochondrial                                                                  | Q00059        | TFAM              | -0.150336356       | -0.3085087         | 1.171368061        |  | 0.28944628        | 1                | 0.59222        |  |   |
| Vigilin                                                                                                | Q00341        | HDLBP             | 0.980009247        | 1.188416927        | 0.811875984        |  | 0.09840397        | 1                | 0.73           |  |   |
| Receptor expression-enhancing protein 5                                                                | Q00765        | REEP5             | 1.573847471        | 1.602714716        | 0.971545434        |  | 0.89876504        | 1                | 0.57444        |  |   |
| Fatty acid-binding protein, epidermal                                                                  | Q01469        | FABP5             | 0.462010926        | 0.256233953        | 1.228479189        |  | 0.16254861        | 1                | 0.67333        |  |   |
| Hydroxymethylglutaryl-CoA synthase, cytoplasmic                                                        | Q01581        | HMGCS1            | -2.189897873       | -2.18729475        | 0.997400261        |  | 0.99458368        | 1                | 0.57667        |  |   |
| Transgelin                                                                                             | Q01995        | TAGLN             | 2.36053822         | 1.690459883        | 1.954390415        |  | 0.25481977        | 1                | 0.50222        |  |   |
| Caldesmon                                                                                              | Q05682        | CALD1             | 1.7667094          | 1.877692587        | 0.894953796        |  | 0.59729373        | 1                | 0.55111        |  |   |
| Quinone oxidoreductase                                                                                 | Q08257        | CRYZ              | -0.078863835       | 0.115218765        | 0.823589873        |  | 0.16125651        | 1                | 0.52556        |  |   |
| Neuroblast differentiation-associated protein AHNAK                                                    | Q09666        | AHNAK             | 0.821450073        | 1.055942573        | 0.790972166        |  | 0.01932731        | 0.8445092        | 0.73778        |  |   |
| <b>Delta(3,5)-Delta(2,4)-dienoyl-CoA isomerase, mitochondrial</b>                                      | <b>Q13011</b> | <b>ECH1</b>       | <b>1.33894196</b>  | <b>0.95922688</b>  | <b>1.461868015</b> |  | <b>0.008868</b>   | <b>0.7357828</b> | <b>0.74667</b> |  |   |
| Selenium-binding protein 1                                                                             | Q13228-4      | SELENBP1          | 1.945265969        | 1.946060487        | 0.999205798        |  | 0.99875261        | 1                | 0.55111        |  |   |
| Integrin-linked protein kinase                                                                         | Q13418        | ILK               | 1.86946972         | 1.367693529        | 1.651652316        |  | 0.05971944        | 1                | 0.64           |  |   |
| NAD(P) transhydrogenase, mitochondrial                                                                 | Q13423        | NNT               | 1.209602587        | 0.926573327        | 1.327143993        |  | 0.10286416        | 1                | 0.64           |  |   |
| Four and a half LIM domains protein 1                                                                  | Q13642-1      | FHL1              | 1.022164953        | 1.29995276         | 0.757457532        |  | 0.28298386        | 1                | 0.53667        |  |   |
| Coactosin-like protein                                                                                 | Q14019        | COTL1             | 1.754150993        | 2.090965267        | 0.714041444        |  | 0.1455381         | 1                | 0.58278        |  |   |
| Desmoglein-2                                                                                           | Q14126        | DSG2              | 1.174527192        | 1.228953487        | 0.947028308        |  | 0.82257861        | 1                | 0.53333        |  |   |
| Four and a half LIM domains protein 2                                                                  | Q14192        | FHL2              | 1.46094892         | 2.2786376          | 0.44145081         |  | 0.04624261        | 1                | 0.59111        |  |   |
|                                                                                                        | Q14195-2      |                   | 1.820816253        | 2.25058824         | 0.650657436        |  | 0.17666248        | 1                | 0.53889        |  |   |
| Filamin-C                                                                                              | Q14315-2      | FLNC              | -0.354484161       | 0.178306494        | 0.586964666        |  | 0.01217086        | 0.7357828        | 0.67333        |  |   |
| Plastin-1                                                                                              | Q14651        | PLS1              | 1.51437708         | 1.92637308         | 0.662326925        |  | 0.37252541        | 1                | 0.51556        |  |   |
| Signal peptidase complex subunit 2                                                                     | Q15005        | SPCS2             | 1.377748233        | 1.771016147        | 0.674847923        |  | 0.24137743        | 1                | 0.63778        |  |   |
| 3-beta-hydroxysteroid-Delta(8),Delta(7)-isomerase                                                      | Q15125        | EBP               | -1.284896146       | -1.4778912         | 1.212876794        |  | 0.12625457        | 1                | 0.69889        |  |   |
| Protein transport protein Sec23B                                                                       | Q15437        | SEC23B            | 1.290670436        | 1.430636893        | 0.869387397        |  | 0.48880456        | 1                | 0.65222        |  |   |
| Myosin light chain kinase, smooth muscle;Myosin light chain kinase, smooth muscle, deglutamylated form | Q15746-11     | MYLK              | 1.266430007        | 1.0325557          | 1.263485671        |  | 0.40762052        | 1                | 0.70333        |  | + |
| Zyxin                                                                                                  | Q15942        | ZYX               | 1.186784267        | 1.321907329        | 0.873608397        |  | 0.48423009        | 1                | 0.57444        |  |   |
| Fascin                                                                                                 | Q16658        | FSCN1             | -1.619593187       | -1.42741238        | 0.825157661        |  | 0.19083144        | 1                | 0.57889        |  |   |
| Anterior gradient protein 2 homolog                                                                    | Q4JM47        | AGR2              | 3.744311533        | 3.636447533        | 1.113896245        |  | 0.77694139        | 1                | 0.54556        |  |   |
| OClA domain-containing protein 2                                                                       | Q56VL3        | OClAD2            | 0.825101046        | 1.009989907        | 0.831196657        |  | 0.21673424        | 1                | 0.67333        |  |   |
| Polymerase I and transcript release factor                                                             | Q6NZI2        | PTRF              | 1.55917804         | 1.84986144         | 0.747752379        |  | 0.28216015        | 1                | 0.62           |  |   |
| <b>Staphylococcal nuclease domain-containing protein 1</b>                                             | <b>Q7KZF4</b> | <b>SNF1</b>       | <b>0.597645973</b> | <b>0.883261953</b> | <b>0.751551171</b> |  | <b>8.34E-03</b>   | <b>7.36E-01</b>  | <b>0.79222</b> |  |   |
| Probable ATP-dependent RNA helicase DDX46                                                              | Q7L014        | DDX46             | -0.541100357       | -0.41279827        | 0.879587624        |  | 0.50520116        | 1                | 0.53056        |  |   |

|                                                                                                                                   |          |          |              |             |             |  |            |           |           |     |   |
|-----------------------------------------------------------------------------------------------------------------------------------|----------|----------|--------------|-------------|-------------|--|------------|-----------|-----------|-----|---|
| Myosin-14                                                                                                                         | Q7Z406-6 | MYH14    | 1.326320935  | 1.053166147 | 1.314103637 |  | 0.24001955 | 1         | 0.50889   |     |   |
| Dolichyl-diphosphooligosaccharide--protein glycosyltransferase subunit STT3B                                                      | Q8TCJ2   | STT3B    | 0.714213467  | 0.778516007 | 0.937721258 |  | 0.76393632 | 1         | 0.52444   |     |   |
| Palladin                                                                                                                          | Q8WX93   | PALLD    | 0.256832322  | 0.651241127 | 0.674078434 |  | 0.06110642 | 1         | 0.67222   |     | + |
| Histone H1x                                                                                                                       | Q92522   | H1FX     | 1.23549642   | 1.043737607 | 1.211378313 |  | 0.1724035  | 1         | 0.64      |     |   |
| Nuclear pore complex protein Nup205                                                                                               | Q92621   | NUP205   | 0.076708028  | 0.068935868 | 1.007802442 |  | 0.9686071  | 1         | 0.52111   |     |   |
| UPF0556 protein C19orf10                                                                                                          | Q969H8   | C19orf10 | 1.753912286  | 1.58496646  | 1.184055992 |  | 0.30190825 | 1         | 0.51556   |     |   |
| ERO1-like protein alpha                                                                                                           | Q96HE7   | ERO1L    | 0.790724543  | 1.197314457 | 0.665917218 |  | 0.33650396 | 1         | 0.63222   |     |   |
| Succinyl-CoA ligase [GDP-forming] subunit beta, mitochondrial                                                                     | Q96I99   | SUCLG2   | 2.049002653  | 2.15590806  | 0.898610672 |  | 0.72217907 | 1         | 0.50111   |     |   |
| Coronin-1B;Coronin                                                                                                                | Q9BR76   | CORO1B   | 0.466756996  | 0.245113579 | 1.248126238 |  | 0.03434742 |           | 0.9770699 | 0.7 |   |
| Extended synaptotagmin-1                                                                                                          | Q9BSJ8   | ESYT1    | 0.167861401  | 0.410523255 | 0.784536757 |  | 0.02888802 | 0.9032131 | 0.64333   |     |   |
| cAMP-dependent protein kinase type II-alpha regulatory subunit                                                                    | Q9BUB1   | PRKAR2A  | 1.188349186  | 1.010812174 | 1.194272259 |  | 0.2517187  | 1         | 0.62778   |     |   |
| Probable ATP-dependent RNA helicase DDX23                                                                                         | Q9BUQ8   | DDX23    | -0.22431835  | -0.0462029  | 0.836845807 |  | 0.23975687 | 1         | 0.55222   |     |   |
| Transmembrane protein 109                                                                                                         | Q9BVC6   | TMEM109  | 0.675866     | 0.529000873 | 1.158197743 |  | 0.32719884 | 1         | 0.52667   |     |   |
| Transmembrane emp24 domain-containing protein 9                                                                                   | Q9BVK6   | TMED9    | 1.339023993  | 1.566429867 | 0.796597399 |  | 0.02828178 | 0.9032131 | 0.61778   |     |   |
| N-alpha-acetyltransferase 15, NatA auxiliary subunit                                                                              | Q9BXJ9   | NAA15    | -0.800819967 | -0.81910722 | 1.018455489 |  | 0.94080679 | 1         | 0.59333   |     |   |
| Magnesium transporter protein 1                                                                                                   | Q9H0U3   | MAGT1    | 1.116812921  | 1.235715445 | 0.887894345 |  | 0.71174197 | 1         | 0.63889   |     |   |
| Ras-related protein Rab-1B                                                                                                        | Q9H0U4   | RAB1B    | 0.193526137  | -0.03501631 | 1.256766866 |  | 0.01236498 | 0.7357828 | 0.73444   |     |   |
| Nuclear ubiquitous casein and cyclin-dependent kinase substrate 1                                                                 | Q9H1E3-2 | NUCKS1   | 0.11391187   | 0.046915259 | 1.069291855 |  | 0.68379245 | 1         | 0.51      |     |   |
| Aminopeptidase B                                                                                                                  | Q9H4A4   | RNPEP    | 1.445600407  | 0.954756711 | 1.63369398  |  | 0.00478559 | 0.7357828 | 0.68667   |     |   |
| Calcyclin-binding protein                                                                                                         | Q9HB71   | CACYBP   | -0.694619733 | -0.92920704 | 1.264386857 |  | 0.00380178 | 0.7357828 | 0.67556   |     |   |
| Nucleolar RNA helicase 2                                                                                                          | Q9NR30   | DDX21    | -1.169269773 | -1.3577177  | 1.20737421  |  | 0.28887024 | 1         | 0.50667   |     |   |
| Dipeptidyl peptidase 3                                                                                                            | Q9NY33-4 | DPP3     | -0.261148562 | -0.45588625 | 1.214992242 |  | 0.03092372 | 0.9389805 | 0.59111   |     |   |
| Tropomodulin-3                                                                                                                    | Q9NYL9   | TMOD3    | 1.077925747  | 0.905241711 | 1.188490526 |  | 0.43665415 | 1         | 0.58222   |     |   |
| UDP-glucose:glycoprotein glucosyltransferase 1                                                                                    | Q9NYU2-2 | UGGT1    | 1.056485933  | 1.2454121   | 0.827847627 |  | 0.39379684 | 1         | 0.51222   |     |   |
| 7-dehydrocholesterol reductase                                                                                                    | Q9UBM7   | DHCR7    | -1.529923152 | -1.89311729 | 1.437914981 |  | 0.20071026 | 1         | 0.63222   |     |   |
| SUMO-activating enzyme subunit 2                                                                                                  | Q9UBT2   | UBA2     | -0.525500111 | -0.74672331 | 1.247601859 |  | 0.10129344 | 1         | 0.59333   |     |   |
| Protein CDV3 homolog                                                                                                              | Q9UKY7   | CDV3     | 0.206468866  | 0.30375486  | 0.907296488 |  | 0.53648182 | 1         | 0.58111   |     |   |
| Protein kinase C and casein kinase substrate in neurons protein 2                                                                 | Q9UNF0-2 | PACSN2   | 1.060679307  | 0.765006227 | 1.344030695 |  | 0.01514014 | 0.7532885 | 0.71333   |     |   |
| Serine/arginine repetitive matrix protein 2                                                                                       | Q9UQ35   | SRRM2    | -0.51321322  | -0.65786377 | 1.155635659 |  | 0.40980843 | 1         | 0.52333   |     |   |
| Nck-associated protein 1                                                                                                          | Q9Y2A7   | NCKAP1   | 0.228030687  | 0.125541967 | 1.107924804 |  | 0.63533723 | 1         | 0.73667   |     |   |
| Protein canopy homolog 2                                                                                                          | Q9Y2B0   | CNPY2    | 0.66229442   | 0.431944517 | 1.259040475 |  | 0.07143726 | 1         | 0.63556   |     |   |
| Glutathione S-transferase kappa 1                                                                                                 | Q9Y2Q3   | GSTK1    | 2.176378793  | 1.928632487 | 1.281134876 |  | 0.46300751 | 1         | 0.54222   |     |   |
| Ribosome maturation protein SBDS                                                                                                  | Q9Y3A5   | SBDS     | 0.049269031  | 0.262272319 | 0.80815348  |  | 0.10084751 | 1         | 0.63      |     | + |
| Transmembrane emp24 domain-containing protein 7                                                                                   | Q9Y3B3   | TMED7    | 1.49930974   | 1.427883953 | 1.07403844  |  | 0.64213085 | 1         | 0.57      |     |   |
| Deoxynucleoside triphosphate triphosphohydrolase SAMHD1                                                                           | Q9Y3Z3   | SAMHD1   | 2.32014386   | 2.638012727 | 0.727698208 |  | 0.49219024 | 1         | 0.53778   |     | + |
| Phosphoserine aminotransferase                                                                                                    | Q9Y617   | PSAT1    | -2.596856833 | -2.9964868  | 1.491272775 |  | 0.35646083 | 1         | 0.51556   |     |   |
| Sulfide:quinone oxidoreductase, mitochondrial                                                                                     | Q9Y6N5   | SQRDL    | 2.294809647  | 2.3751713   | 0.922782559 |  | 0.87811156 | 1         | 0.56889   |     |   |
| IgGfC-binding protein                                                                                                             | Q9Y6R7   | FCGBP    | 2.524867221  | 2.65107698  | 0.88142994  |  | 0.8088119  | 1         | 0.52556   |     |   |
| Carboxypeptidase;Lysosomal protective protein;Lysosomal protective protein 32 kDa chain;Lysosomal protective protein 20 kDa chain | X6R5C5   | CTSA     | 1.4014434    | 1.072117313 | 1.390031052 |  | 0.08581483 | 1         | 0.64444   |     |   |
