# Supplementary material
Source: HighWire-hosted journal article supplement (https://gut.bmj.com/content/66/9/1573)
Supplement: inline-supplementary-material-9 [file inline-supplementary-material-9.pdf]

| Biological Processes                                       | Subprocess                                                   | Sub-subprocess                                                | # genes | Percent of gene hit against total # genes | Percent of gene hit against total # Pathway hits |
|------------------------------------------------------------|--------------------------------------------------------------|---------------------------------------------------------------|---------|-------------------------------------------|--------------------------------------------------|
| metabolic process (GO:0008152)                             |                                                              |                                                               | 49      | 62.00%                                    | 39.80%                                           |
|                                                            | nitrogen compound metabolic process (GO:0006807)             |                                                               | 2       | 4.10%                                     | 3.90%                                            |
|                                                            | phosphate-containing compound metabolic process (GO:0006796) |                                                               | 1       | 0.02                                      | 2.00%                                            |
|                                                            | generation of precursor metabolites and energy (GO:0006091)  |                                                               | 10      | 0.204                                     | 0.196                                            |
|                                                            | primary metabolic process (GO:0044238)                       |                                                               | 34      | 69.40%                                    | 0.667                                            |
|                                                            |                                                              | nucleobase-containing compound metabolic process (GO:0006139) | 6       | 0.176                                     | 0.15                                             |
|                                                            |                                                              | lipid metabolic process (GO:0006629)                          | 9       | 0.265                                     | 0.225                                            |
|                                                            |                                                              | cellular amino acid metabolic process (GO:0006520)            | 2       | 0.059                                     | 0.05                                             |
|                                                            |                                                              | protein metabolic process (GO:0019538)                        | 15      | 0.441                                     | 0.375                                            |
|                                                            |                                                              | tricarboxylic acid cycle (GO:0006099)                         | 2       | 0.059                                     | 0.05                                             |
|                                                            |                                                              | carbohydrate metabolic process (GO:0005975)                   | 6       | 0.176                                     | 0.15                                             |
|                                                            | coenzyme metabolic process (GO:0006732)                      |                                                               | 2       | 4.10%                                     | 0.039                                            |
|                                                            | sulfur compound metabolic process (GO:0006790)               |                                                               | 2       | 4.10%                                     | 3.90%                                            |
| cellular process (GO:0009987)                              |                                                              |                                                               | 18      | 22.80%                                    | 14.60%                                           |
| cellular component organization or biogenesis (GO:0071840) |                                                              |                                                               | 11      | 13.90%                                    | 8.90%                                            |
| localization (GO:0051179)                                  |                                                              |                                                               | 9       | 11.40%                                    | 7.30%                                            |
| apoptotic process (GO:0006915)                             |                                                              |                                                               | 1       | 1.30%                                     | 0.80%                                            |
| biological regulation (GO:0065007)                         |                                                              |                                                               | 5       | 6.30%                                     | 4.10%                                            |
| response to stimulus (GO:0050896)                          |                                                              |                                                               | 9       | 11.40%                                    | 7.30%                                            |
| developmental process (GO:0032502)                         |                                                              |                                                               | 8       | 10.10%                                    | 6.50%                                            |
| multicellular organismal process (GO:0032501)              |                                                              |                                                               | 4       | 5.10%                                     | 3.30%                                            |
| biological adhesion (GO:0022610)                           |                                                              |                                                               | 1       | 1.30%                                     | 0.80%                                            |
| immune system process (GO:0002376)                         |                                                              |                                                               | 8       | 10.10%                                    | 6.50%                                            |

| Molecular Function                                              | # genes | Percent of gene hit against total # genes | Percent of gene hit against total # Pathway hits |
|-----------------------------------------------------------------|---------|-------------------------------------------|--------------------------------------------------|
| catalytic activity (GO:0003824)                                 | 37      | 46.80%                                    | 48.70%                                           |
| oxidoreductase activity (GO:0016491)                            | 17      | 45.90%                                    | 37.00%                                           |
| transferase activity (GO:0016740)                               | 12      | 32.40%                                    | 26.10%                                           |
| hydrolase activity (GO:0016787)                                 | 10      | 27.00%                                    | 21.70%                                           |
| ligase activity (GO:0016874)                                    | 1       | 2.70%                                     | 2.20%                                            |
| enzyme regulator activity (GO:0030234)                          | 4       | 10.80%                                    | 8.70%                                            |
| lyase activity (GO:0016829)                                     | 1       | 2.70%                                     | 2.20%                                            |
| isomerase activity (GO:0016853)                                 | 1       | 2.70%                                     | 2.20%                                            |
| binding (GO:0005488)                                            | 19      | 24.10%                                    | 25.00%                                           |
| nucleic acid binding transcription factor activity (GO:0001071) | 1       | 1.30%                                     | 1.30%                                            |
| receptor activity (GO:0004872)                                  | 3       | 3.80%                                     | 3.90%                                            |
| enzyme regulator activity (GO:0030234)                          | 4       | 5.10%                                     | 5.30%                                            |
| structural molecule activity (GO:0005198)                       | 7       | 8.90%                                     | 9.20%                                            |
| antioxidant activity (GO:0016209)                               | 1       | 1.30%                                     | 1.30%                                            |
| transporter activity (GO:0005215)                               | 4       | 5.10%                                     | 5.30%                                            |
