# Supplementary material
Source: HighWire-hosted journal article supplement (https://gut.bmj.com/content/66/9/1573)
Supplement: inline-supplementary-material-10 [file inline-supplementary-material-10.pdf]

| Biological Processes                                       | Subprocess                                                    | Sub-subprocess                                     | Sub-subprocess                              | # genes | Percent of gene hit against total # genes | Percent of gene hit against total # Pathway hits |
|------------------------------------------------------------|---------------------------------------------------------------|----------------------------------------------------|---------------------------------------------|---------|-------------------------------------------|--------------------------------------------------|
| metabolic process (GO:0008152)                             |                                                               |                                                    |                                             | 109     | 56.80%                                    | 30.20%                                           |
|                                                            | primary metabolic process (GO:0044238)                        |                                                    |                                             | 83      | 76.10%                                    | 68.60%                                           |
|                                                            |                                                               | lipid metabolic process (GO:0006629)               |                                             | 15      | 18.10%                                    | 14.00%                                           |
|                                                            |                                                               |                                                    | steroid metabolic process (GO:0008202)      | 5       | 33.30%                                    | 41.70%                                           |
|                                                            |                                                               |                                                    | phospholipid metabolic process (GO:0006644) | 1       | 6.70%                                     | 8.30%                                            |
|                                                            |                                                               |                                                    | fatty acid metabolic process (GO:0006631)   | 6       | 40.00%                                    | 50.00%                                           |
|                                                            |                                                               | cellular amino acid metabolic process (GO:0006520) |                                             | 6       | 7.20%                                     | 5.60%                                            |
|                                                            | protein metabolic process (GO:0019538)                        |                                                    |                                             | 37      | 44.60%                                    | 34.60%                                           |
|                                                            |                                                               | proteolysis (GO:0006508)                           |                                             | 11      | 29.70%                                    | 30.60%                                           |
|                                                            |                                                               | translation (GO:0006412)                           |                                             | 7       | 18.90%                                    | 19.40%                                           |
|                                                            |                                                               | protein complex assembly (GO:0006461)              |                                             | 2       | 5.40%                                     | 5.60%                                            |
|                                                            |                                                               | protein folding (GO:0006457)                       |                                             | 4       | 10.80%                                    | 11.10%                                           |
|                                                            |                                                               | cellular protein modification process (GO:0006464) |                                             | 12      | 32.40%                                    | 33.30%                                           |
|                                                            | nucleobase-containing compound metabolic process (GO:0006139) |                                                    |                                             | 31      | 37.30%                                    | 29.00%                                           |
|                                                            | tricarboxylic acid cycle (GO:0006099)                         |                                                    |                                             | 3       | 3.60%                                     | 2.80%                                            |
|                                                            | carbohydrate metabolic process (GO:0005975)                   |                                                    |                                             | 15      | 18.10%                                    | 14.00%                                           |
|                                                            | phosphate-containing compound metabolic process (GO:0006796)  |                                                    |                                             | 5       | 4.60%                                     | 4.10%                                            |
|                                                            | biosynthetic process (GO:0009058)                             |                                                    |                                             | 2       | 1.80%                                     | 1.70%                                            |
|                                                            | vitamin metabolic process (GO:0006766)                        |                                                    |                                             | 3       | 2.80%                                     | 2.50%                                            |
|                                                            | catabolic process (GO:0009056)                                |                                                    |                                             | 2       | 1.80%                                     | 1.70%                                            |
|                                                            | sulfur compound metabolic process (GO:0006790)                |                                                    |                                             | 1       | 0.90%                                     | 0.80%                                            |
|                                                            | coenzyme metabolic process (GO:0006732)                       |                                                    |                                             | 8       | 7.30%                                     | 6.60%                                            |
|                                                            | nitrogen compound metabolic process (GO:0006807)              |                                                    |                                             | 6       | 5.50%                                     | 5.00%                                            |
|                                                            | generation of precursor metabolites and energy (GO:0006091)   |                                                    |                                             | 11      | 10.10%                                    | 9.10%                                            |
| cellular component organization or biogenesis (GO:0071840) |                                                               |                                                    |                                             | 35      | 18.20%                                    | 9.70%                                            |
| cellular process (GO:0009987)                              |                                                               |                                                    |                                             | 64      | 33.30%                                    | 17.70%                                           |
| localization (GO:0051179)                                  |                                                               |                                                    |                                             | 25      | 13.00%                                    | 6.90%                                            |
| apoptotic process (GO:0006915)                             |                                                               |                                                    |                                             | 4       | 2.10%                                     | 1.10%                                            |
| reproduction (GO:0000003)                                  |                                                               |                                                    |                                             | 4       | 2.10%                                     | 1.10%                                            |
| biological regulation (GO:0065007)                         |                                                               |                                                    |                                             | 27      | 14.10%                                    | 7.50%                                            |
| response to stimulus (GO:0050896)                          |                                                               |                                                    |                                             | 15      | 7.80%                                     | 4.20%                                            |
| developmental process (GO:0032502)                         |                                                               |                                                    |                                             | 33      | 17.20%                                    | 9.10%                                            |
| multicellular organismal process (GO:0032501)              |                                                               |                                                    |                                             | 16      | 8.30%                                     | 4.40%                                            |
| biological adhesion (GO:0022610)                           |                                                               |                                                    |                                             | 10      | 5.20%                                     | 2.80%                                            |
| immune system process (GO:0002376)                         |                                                               |                                                    |                                             | 19      | 9.90%                                     | 5.30%                                            |

| Molecular Function                                              | # genes | Percent of gene hit against total # genes | Percent of gene hit against total # Pathway hits |
|-----------------------------------------------------------------|---------|-------------------------------------------|--------------------------------------------------|
| catalytic activity (GO:0003824)                                 | 85      | 44.30%                                    | 37.30%                                           |
| helicase activity (GO:0004386)                                  | 4       | 4.70%                                     | 3.70%                                            |
| ligase activity (GO:0016874)                                    | 8       | 9.40%                                     | 7.40%                                            |
| oxidoreductase activity (GO:0016491)                            | 21      | 24.70%                                    | 19.40%                                           |
| transferase activity (GO:0016740)                               | 23      | 27.10%                                    | 21.30%                                           |
| enzyme regulator activity (GO:0030234)                          | 15      | 17.60%                                    | 13.90%                                           |
| hydrolase activity (GO:0016787)                                 | 29      | 34.10%                                    | 26.90%                                           |
| lyase activity (GO:0016829)                                     | 4       | 4.70%                                     | 3.70%                                            |
| isomerase activity (GO:0016853)                                 | 4       | 4.70%                                     | 3.70%                                            |
| transporter activity (GO:0005215)                               | 11      | 5.70%                                     | 4.80%                                            |
| translation regulator activity (GO:0045182)                     | 3       | 1.60%                                     | 1.30%                                            |
| protein binding transcription factor activity (GO:0000988)      | 3       | 1.60%                                     | 1.30%                                            |
| enzyme regulator activity (GO:0030234)                          | 15      | 7.80%                                     | 6.60%                                            |
| receptor activity (GO:0004872)                                  | 12      | 6.30%                                     | 5.30%                                            |
| nucleic acid binding transcription factor activity (GO:0001071) | 7       | 3.60%                                     | 3.10%                                            |
| antioxidant activity (GO:0016209)                               | 1       | 0.50%                                     | 0.40%                                            |
| structural molecule activity (GO:0005198)                       | 27      | 14.10%                                    | 11.80%                                           |
| binding (GO:0005488)                                            | 64      | 33.30%                                    | 28.10%                                           |
