# Supplementary material
Source: HighWire-hosted journal article supplement (https://gut.bmj.com/content/66/9/1573)
Supplement: inline-supplementary-material-11 [file inline-supplementary-material-11.pdf]

|                                                              |          |  |  |  |  |       |                      |        |    |  |   |  |  |
|--------------------------------------------------------------|----------|--|--|--|--|-------|----------------------|--------|----|--|---|--|--|
| Myosin regulatory light chain 12A                            | J3QRS3   |  |  |  |  | 0.296 | 0.04463 to 0.8263    | 0.0359 | *  |  | + |  |  |
| Non-POU domain-containing octamer-binding protein            | Q15233   |  |  |  |  | 0.364 | -0.8460 to -0.1535   | 0.0134 | *  |  |   |  |  |
| Nucleolin                                                    | P19338   |  |  |  |  | 0.263 | -0.8040 to -0.02261  | 0.0423 | *  |  |   |  |  |
| Obg-like ATPase 1                                            | J3KQ32   |  |  |  |  | 0.545 | -0.9035 to -0.3831   | 0.0011 | ** |  |   |  |  |
| Protein transport protein Sec23A                             | F5H365   |  |  |  |  | 0.406 | -0.8610 to -0.2071   | 0.0079 | ** |  |   |  |  |
| Protein-L-isoaspartate O-methyltransferase                   | H7BY58   |  |  |  |  | 0.273 | -0.8086 to -0.03590  | 0.0379 | *  |  |   |  |  |
| Puromycin-sensitive aminopeptidase                           | E9PLK3   |  |  |  |  | 0.25  | -0.7978 to -0.005228 | 0.0488 | *  |  |   |  |  |
| rRNA 2'-O-methyltransferase fibrillarlin                     | M0R2Q4   |  |  |  |  | 0.27  | -0.8072 to -0.03177  | 0.0393 | *  |  |   |  |  |
| Serine/arginine-rich-splicing factor 7                       | C9JAB2   |  |  |  |  | 0.336 | -0.8354 to -0.1181   | 0.0186 | *  |  |   |  |  |
| Signal recognition particle 9 kDa protein                    | P49458   |  |  |  |  | 0.269 | -0.8067 to -0.03044  | 0.0397 | *  |  |   |  |  |
| Small nuclear ribonucleoprotein-associated proteins B and B' | P14678-2 |  |  |  |  | 0.394 | -0.8570 to -0.1922   | 0.0092 | ** |  |   |  |  |
| Splicing factor 3A subunit 3                                 | Q12874   |  |  |  |  | 0.393 | -0.8566 to -0.1908   | 0.0093 | ** |  |   |  |  |
| T-complex protein 1 subunit beta                             | P78371   |  |  |  |  | 0.249 | -0.7975 to -0.004483 | 0.0491 | *  |  |   |  |  |
| Thyroid hormone receptor-associated protein 3                | Q9Y2W1   |  |  |  |  | 0.292 | -0.8170 to -0.06052  | 0.0308 | *  |  |   |  |  |
| Transportin-1                                                | Q92973-2 |  |  |  |  | 0.321 | -0.8293 to -0.09844  | 0.0221 | *  |  |   |  |  |
